# Supplementary material for: A TEMPO promoted tandem reaction of 2-aminobenzophenones and benzylamines under electrochemical conditions
Source: Royal Society of Chemistry journal article supplement (doi:10.1039/d4ob00037d), 2024-01-01
Supplement: d4ob00037d1.pdf [file d4ob00037d1.pdf]

# **Supplementary Information**

## **Tempo Promoted Tandem Reaction of 2- Aminobenzophenones and Benzylamines under Electrochemical Conditions**

Yu Wang, Yekai Huang\*, Yanan Li, Kuiliang Li and Zaigang Luo

School of Chemical and Blasting Engineering, Anhui University of Science and Technology,

Huainan 232001, China.

E-mail: huangyk@mail.ustc.edu.cn

### **Table of contents**

|                                                                  |            |
|------------------------------------------------------------------|------------|
| <b>Part I Experiment Section</b>                                 | <b>S2</b>  |
| <b>Part II HRMS data for <sup>15</sup>N-labelled quinazoline</b> | <b>S4</b>  |
| <b>Part III The Analytical Data of Products</b>                  | <b>S6</b>  |
| <b>Part IV NMR Spectra</b>                                       | <b>S11</b> |
| <b>Part V Control Experiments</b>                                | <b>S36</b> |
| <b>Part VI References</b>                                        | <b>S37</b> |

## Part I Experiment Section

### 1.1 General Information

$^1\text{H}$  NMR and  $^{13}\text{C}$  NMR were recorded on a 500 MHz Nuclear Magnetic Resonance Spectrometer ( $^1\text{H}$  NMR: 500 MHz,  $^{13}\text{C}$  NMR: 126 MHz) using TMS as the internal reference. Chemical shifts were expressed as  $\delta$  with respect to TMS and coupling constants  $J$  are expressed in Hz. HRMS (ESI) were recorded on a Q-TOF Premier. Commercially available compounds were used without further purification. Solvents were purified according to the standard procedures unless otherwise noted.

### 1.2 General Procedures for the Synthesis of Quinazolines

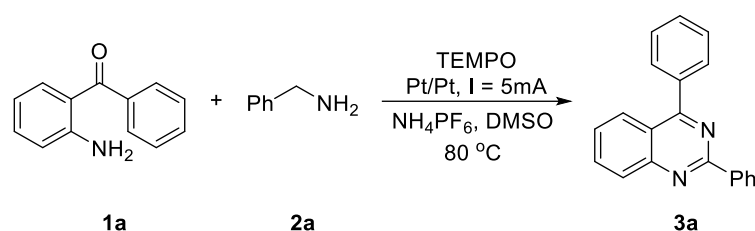

**1a** (2-aminobenzophenone, 0.3 mmol, 59.2 mg), ammonium hexafluorophosphate ( $\text{NH}_4\text{PF}_6$ , 0.6 mmol, 97.8 mg), and TEMPO (2,2,6,6-tetramethylpiperidinoxy, 0.06 mmol, 4.7 mg) were added to a 10 mL reaction tube, followed by addition of 3 mL dimethylsulfoxide using a plastic pipette. Then add **2a** (benzylamine, 0.6 mmol, 65.5  $\mu\text{L}$ ) with a microsyringe and use the Pt/Pt as electrodes. The reaction mixture was heated at 80 °C while stirring and monitoring the voltage. When the reaction was completed, the reaction solution was extracted three times with water and ethyl acetate, and the combined organic phases were dried over anhydrous sodium sulfate and evaporated in vacuo to obtain the crude product. The residue was purified by flash column chromatography (petroleum ether/ethyl acetate) to give **3a**.

### 1.3 Gram-scale experiment

**1a** (2-aminobenzophenone, 6 mmol, 1.183 g),  $\text{NH}_4\text{PF}_6$  (12 mmol, 1.956 g), and TEMPO (2,2,6,6-tetramethylpiperidinoxy, 1.2 mmol, 94 mg) were added to a 100 mL reaction flask, followed by addition of 60 mL DMSO using a plastic pipette. Then add **2a** (benzylamine, 12 mmol, 1.31 mL) with a pipette and use the Pt/Pt as electrodes. The reaction mixture was heated at 80 °C while stirring and monitoring the voltage. When the reaction was completed, the reaction solution was extracted three times with water and ethyl acetate, and the combined organic phases were dried over anhydrous sodium sulfate and evaporated in vacuo to obtain the crude product. The residue was purified by flash column chromatography (petroleum ether/ethyl acetate) to give **3a** (1.1 g, 65%).

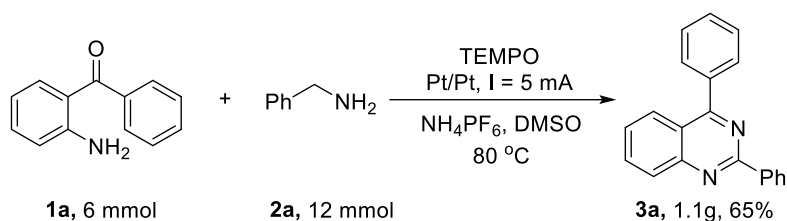

#### 1.4 Steps in the synthesis of substrates

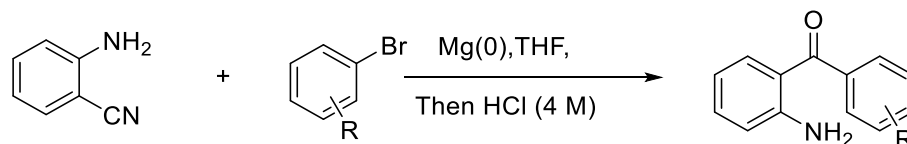

The magnesium strip (1.1 equiv.) and dry THF (1 M) were added to a flame-dried round-bottomed flask. Following the dropwise addition of aryl bromide (1.0 equiv.), the reaction mixture was kept under reflux conditions for 2 hours. Then 2-amino benzonitrile (0.2 to 0.25 eq.) was added. The reaction was heated to 60 °C and continued for about 12 hours. After consumption of the material, the reaction was quenched with a solution of 4 M hydrochloric acid in EtOH at 0 °C and then heated at reflux overnight. Concentrated in a vacuum and quenched with saturated sodium bicarbonate followed by extraction with EtOAc ( $\times 3$ ). The organic layers were combined, dried, and concentrated in anhydrous sodium sulfate to give the crude product. The crude mixture was then purified by column chromatography using petroleum ether/ethyl acetate as eluent to give the target product.

## 1.5 The electrochemical reaction setting and the parameters of the electrochemical reactor

### 1.5.1 The picture of the electrochemical reaction setting

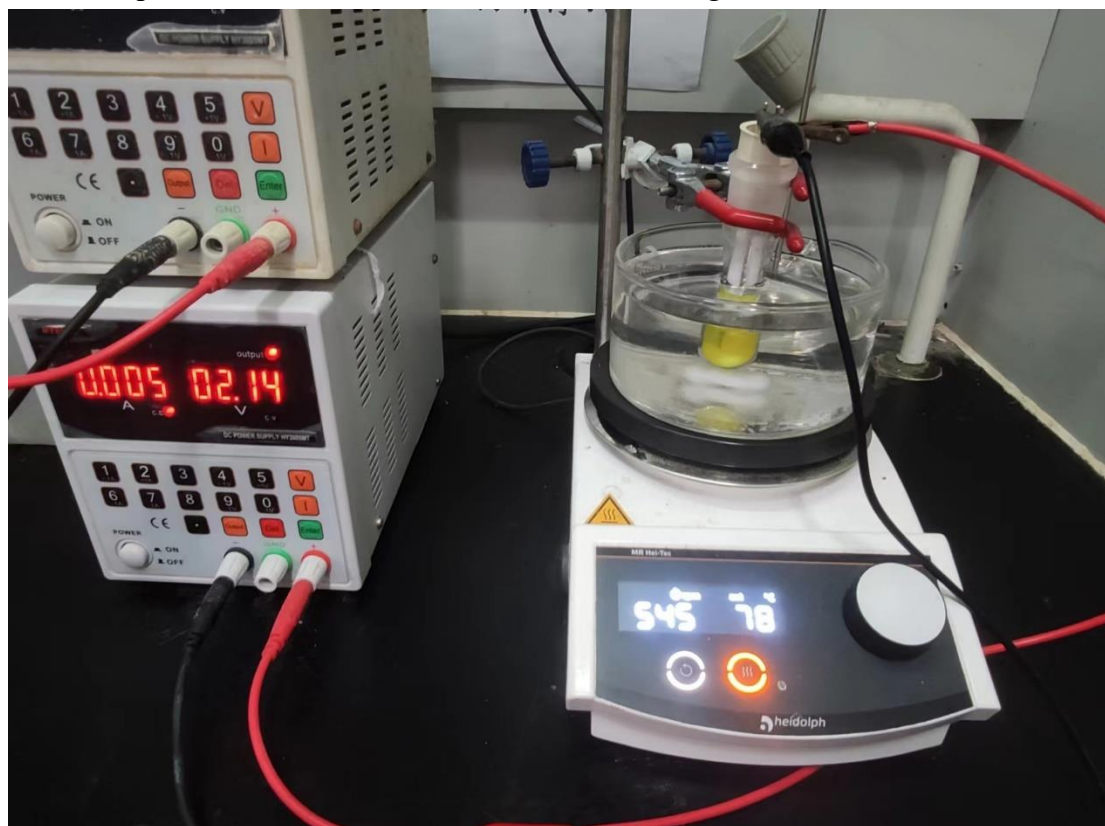

### 1.5.2 The parameters of the electrochemical reactor

|                             |                                                                |
|-----------------------------|----------------------------------------------------------------|
| Model number                | HY3005MT                                                       |
| Output voltage              | 0-30VDC                                                        |
| Output current              | 0-5VDC                                                         |
| Ripple and noise            | CV $\leq$ 5 mV r ms CC $\leq$ 20 mA                            |
| Input voltage               | 220VAC+10% 50HZ                                                |
| Power supply effect         | CV $\leq$ 0.1%+3 mV CC $\leq$ 0.5%+3mA                         |
| load effect                 | CV $\leq$ 0.05%+3 mV CC $\leq$ 0.5%+10mA                       |
| Monitor                     | Dual 4-digit LED display                                       |
| Protection                  | Current limit, short circuit, overload and overheat protection |
| Operating environment       | 0~+40°C Relative humidity:<90%                                 |
| Locking function            | Have                                                           |
| Anti-impact output control  | Have                                                           |
| Voltage indication accuracy | LED $\pm$ 0.5% + 5 characters                                  |
| Current indicating accuracy | LED $\pm$ 1 % +5 characters                                    |
| Volume                      | 24 length x 13 width x 15 height CM                            |
| Weight                      | 2KG                                                            |

## Part II HRMS data for $^{15}\text{N}$ -labelled quinazoline

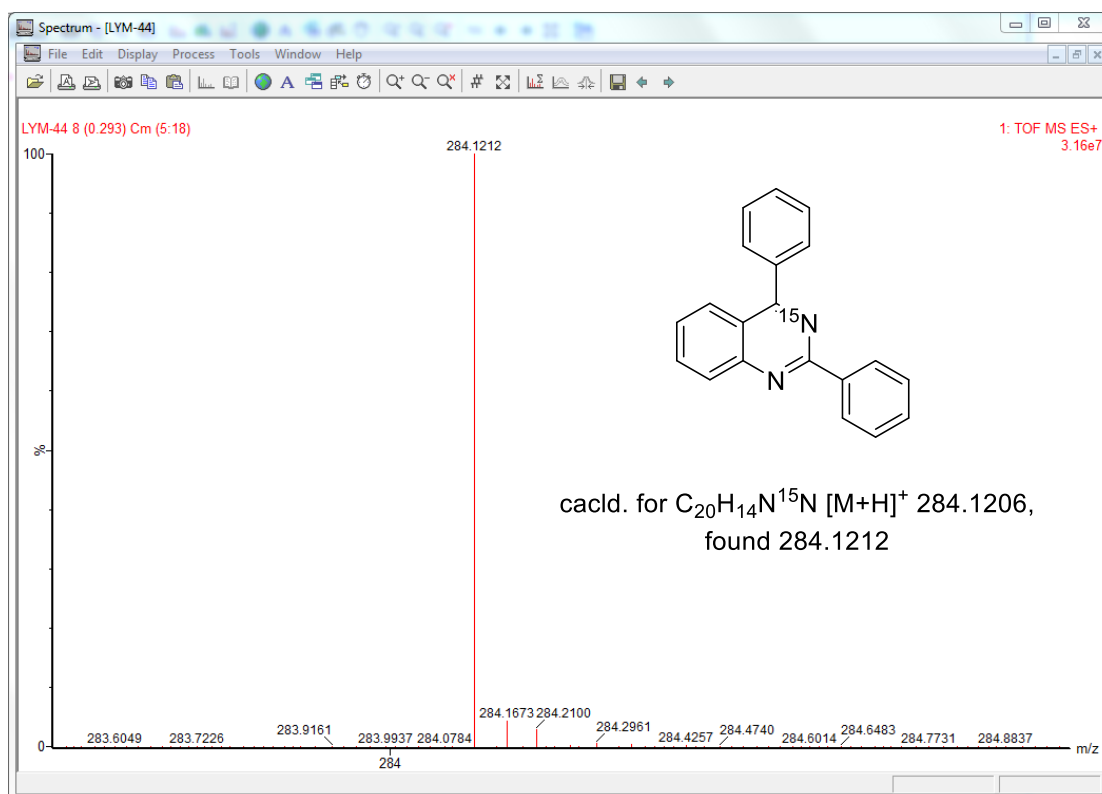

### Part III The Analytical Data of Products

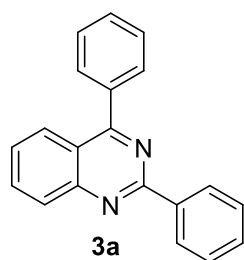

**2,4-diphenylquinazoline(3a<sup>1</sup>):** <sup>1</sup>H NMR (500 MHz, CDCl<sub>3</sub>) δ 8.55 (d, *J* = 7.2 Hz, 2H), 7.93 (d, *J* = 8.4 Hz, 1H), 7.85 (d, *J* = 8.4 Hz, 1H), 7.70 – 7.64 (m, 2H), 7.62 – 7.55 (m, 1H), 7.41 – 7.28 (m, 6H), 7.27 – 7.21 (m, 1H). <sup>13</sup>C NMR (126 MHz, CDCl<sub>3</sub>) δ 168.3, 160.2, 152.0, 138.3, 137.7, 133.6, 130.7, 130.3, 130.0, 129.2, 128.8, 128.6, 127.1, 121.7.

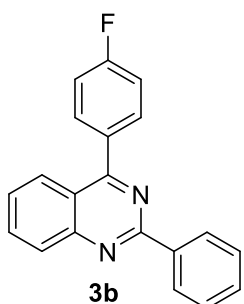

**4-(4-fluorophenyl)-2-phenylquinazoline(3b<sup>7</sup>):** <sup>1</sup>H NMR (500 MHz, CDCl<sub>3</sub>) δ 8.71 – 8.66 (m, 2H), 8.19 (d, *J* = 6.8 Hz, 1H), 8.09 – 8.06 (m, 1H), 7.92 – 7.89 (m, 1H), 7.76 (q, *J* = 8.5 Hz, 3H), 7.58 – 7.51 (m, 4H), 7.25 (s, 1H). <sup>13</sup>C NMR (126 MHz, CDCl<sub>3</sub>) δ 167.3, 164.0 (*J*<sub>C-F</sub> = 135.4 Hz), 160.2, 151.9, 137.9, 136.5, 132.3 (*J*<sub>C-F</sub> = 8.3 Hz), 131.8, 130.7, 129.2, 128.6, 127.3, 126.6, 124.7, 121.4 (*J*<sub>C-F</sub> = 21.7 Hz). <sup>19</sup>F NMR (471 MHz, CDCl<sub>3</sub>) δ 110.6.

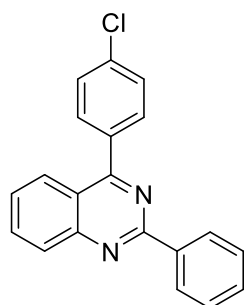

**4-(4-chlorophenyl)-2-phenylquinazoline(3c<sup>6</sup>):** <sup>1</sup>H NMR (500 MHz, CDCl<sub>3</sub>) δ 8.7-8.6 (m, 2H), 8.14 (d, *J* = 8.5 Hz, 1H), 8.03 (d, *J* = 8.3 Hz, 1H), 7.88 – 7.78 (m, 2H), 7.60 – 7.47 (m, 3H). <sup>13</sup>C NMR (126 MHz, CDCl<sub>3</sub>) δ 167.1, 160.2, 152.0, 138.0, 136.3, 136.1, 133.7, 131.6, 130.7, 129.3, 128.9, 128.7, 128.6, 127.3, 126.6, 121.5

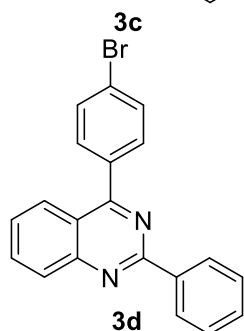

**4-(4-bromophenyl)-2-phenylquinazoline(3d<sup>1</sup>):** <sup>1</sup>H NMR (500 MHz, CDCl<sub>3</sub>) δ 8.68 – 8.66 (m, 2H), 8.15 (d, *J* = 8.4 Hz, 1H), 8.06 (d, *J* = 8.4 Hz, 1H), 7.89 – 7.87 (m, 1H), 7.75 (q, *J* = 8.5 Hz, 4H), 7.56 – 7.49 (m, 4H). <sup>13</sup>C NMR (126 MHz, CDCl<sub>3</sub>) δ 167.1, 160.3, 152.1, 138.0, 136.6, 133.8, 131.83, 131.77, 130.7, 129.3, 128.7, 128.6, 127.3, 126.6, 124.7, 121.5.

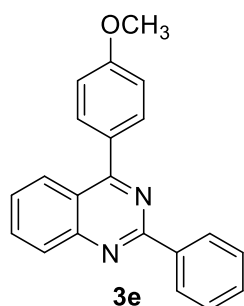

**4-(4-methoxyphenyl)-2-phenylquinazoline(3e<sup>7</sup>):** <sup>1</sup>H NMR (500 MHz, CDCl<sub>3</sub>) δ 8.71 (d, *J* = 6.8 Hz, 2H), 8.18 (d, *J* = 7.9 Hz, 2H), 7.92 – 7.87 (m, 3H), 7.58 – 7.50 (m, 4H), 7.13 (d, *J* = 8.7 Hz, 2H), 3.94 (s, 3H). <sup>13</sup>C NMR (126 MHz, CDCl<sub>3</sub>) δ 168.0, 161.4, 160.0, 133.6, 132.0, 130.6, 130.1, 128.93, 128.91, 128.90, 128.8, 128.6, 127.1, 127.0, 121.6, 114.1, 55.5.

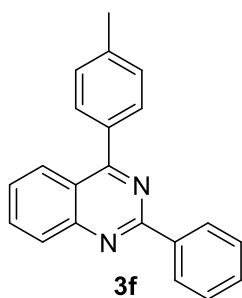

**2-Phenyl-4-(p-tolyl)quinazoline(3f<sup>5</sup>):** <sup>1</sup>H NMR (500 MHz, CDCl<sub>3</sub>) δ 8.73 – 8.66 (m, 1H), 8.19 – 8.13 (m, 1H), 7.90 – 7.84 (m, 1H), 7.80 (d, *J* = 8.0 Hz, 1H), 7.57 – 7.46 (m, 2H), 7.40 (d, *J* = 7.9 Hz, 1H). <sup>13</sup>C NMR (126 MHz, CDCl<sub>3</sub>) δ 168.4, 160.2, 152.0, 140.2, 138.3, 134.9, 133.5, 130.5, 130.2, 129.3, 129.1, 128.7, 128.5, 127.1, 126.9, 121.8, 21.5.

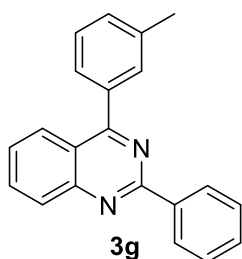

**2-phenyl-4-(m-tolyl)quinazoline(3g<sup>5</sup>):** <sup>1</sup>H NMR (500 MHz, CDCl<sub>3</sub>) δ 8.73 – 8.68 (m, 2H), 8.19 (d, *J* = 8.3 Hz, 1H), 8.13 (d, *J* = 7.8 Hz, 1H), 7.91 – 7.87 (m, 1H), 7.69 (d, *J* = 9.5 Hz, 1H), 7.66 (d, *J* = 7.6 Hz, 1H), 7.58 – 7.47 (m, 5H), 7.40 (d, *J* = 7.6 Hz, 1H), 2.51 (s, 3H). <sup>13</sup>C NMR (126 MHz, CDCl<sub>3</sub>) δ 168.8, 160.2, 151.7, 138.4, 138.1, 137.6, 133.7, 130.8, 130.7, 130.6, 129.0, 128.8, 128.6, 128.4, 127.4, 127.2, 127.1, 121.8, 21.6.

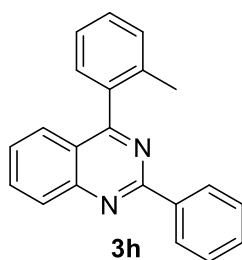

**2-(2-methylphenyl)-4-phenylquinazoline(3h<sup>5</sup>):** <sup>1</sup>H NMR (500 MHz, CDCl<sub>3</sub>) δ 8.67 – 8.65 (m, 2H), 8.17 (d, *J* = 8.4 Hz, 1H), 7.90 – 7.88 (m, 1H), 7.68 (d, *J* = 8.3 Hz, 1H), 7.54 – 7.48 (m, 4H), 7.48 – 7.43 (m, 1H), 7.40 (t, *J* = 9.1 Hz, 2H), 7.37 (t, *J* = 7.2 Hz, 1H), 2.24 (s, 3H). <sup>13</sup>C NMR (126 MHz, CDCl<sub>3</sub>) δ 169.9, 160.3, 151.4, 138.2, 136.9, 136.5, 133.8, 130.8, 130.6, 129.7, 129.3, 129.0, 128.8, 128.6, 127.12, 127.08, 125.7, 122.7, 20.1.

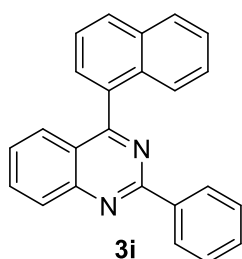

**4-(naphthalen-1-yl)-2-phenylquinazoline(3i<sup>11</sup>):** <sup>1</sup>H NMR (500 MHz, CDCl<sub>3</sub>) δ 8.80 – 8.69 (m, 1H), 8.31 (s, 1H), 8.18-8.14 (m, 1H), 8.06 – 7.90 (m, 2H), 7.89 – 7.82 (m, 1H), 7.63 – 7.44 (m, 3H). <sup>13</sup>C NMR (126 MHz, CDCl<sub>3</sub>) δ 168.3, 160.3, 152.06, 138.3, 135.1, 134.0, 133.6, 133.0, 130.6, 130.4, 129.2, 128.8, 128.6, 127.9, 127.32, 127.30, 127.2, 127.1, 126.7.

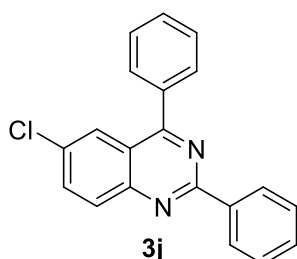

**6-chlorine-2,4-diphenylquinazoline(3j<sup>4</sup>):** <sup>1</sup>H NMR (500 MHz, CDCl<sub>3</sub>) δ 8.64 – 8.58 (m, 2H), 8.05 – 8.02 (m, 2H), 7.83 – 7.79 (m, 2H), 7.76 – 7.74 (m, 1H), 7.59 – 7.52 (m, 3H), 7.45 (q, *J* = 5.0 Hz, 3H). <sup>13</sup>C NMR (126 MHz, CDCl<sub>3</sub>) δ 166.6, 159.4, 149.4, 136.7, 136.5, 133.5, 131.6, 129.8, 129.2, 129.0, 127.73, 127.67, 127.6, 124.8, 121.2.

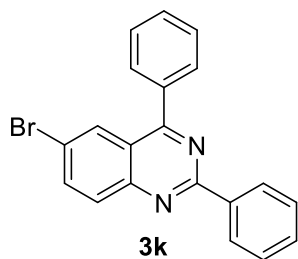

**6-bromo-2,4-diphenylquinazoline(3k<sup>8</sup>):** <sup>1</sup>H NMR (500 MHz, CDCl<sub>3</sub>) δ 8.67 (s, 2H), 8.25 (s, 1H), 8.11 – 7.79 (m, 4H), 7.56 (d, *J* = 49.0 Hz, 6H). <sup>13</sup>C NMR (126 MHz, CDCl<sub>3</sub>) δ 167.5, 160.5, 150.7, 137.7, 137.1, 130.9, 130.9, 130.3, 130.1, 129.1, 128.8, 128.8, 128.6, 122.7, 120.7.

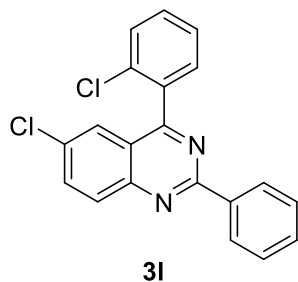

**6-chloro-4-(2-chlorophenyl)-2-phenylquinazoline(3l<sup>2</sup>):** <sup>1</sup>H NMR (500 MHz, CDCl<sub>3</sub>) δ 8.67 – 8.62 (m, 2H), 8.12 (d, *J* = 9.0 Hz, 1H), 7.81 (q, *J* = 9.0 Hz, 1H), 7.63 – 7.58 (m, 2H), 7.55 – 7.46 (m, 6H). <sup>13</sup>C NMR (126 MHz, CDCl<sub>3</sub>) δ 166.5, 160.7, 149.8, 137.6, 135.9, 135.0, 132.9, 132.9, 131.1, 130.92, 130.90, 130.75, 130.2, 128.8, 128.7, 127.1, 125.6, 122.9.

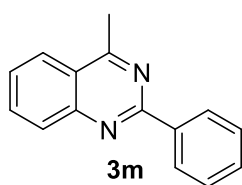

**4-methyl-2-phenylquinazoline(3m<sup>3</sup>):** <sup>1</sup>H NMR (500 MHz, CDCl<sub>3</sub>) δ 8.50 – 8.46 (m, 2H), 7.85 (d, *J* = 8.4 Hz, 1H), 7.75 (d, *J* = 8.3 Hz, 1H), 7.60-7.57 (m, 1H), 7.41 – 7.23 (m, 4H), 2.74 (s, 3H). <sup>13</sup>C NMR (126 MHz, CDCl<sub>3</sub>) δ 168.2, 160.1, 150.4, 138.4, 133.5, 130.4, 129.2, 128.64, 128.59, 126.8, 124.9, 123.0, 22.00.

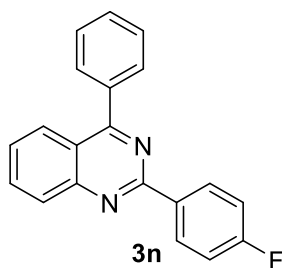

**2-(4-Fluorophenyl)-4-phenylquinazoline(3n<sup>6</sup>):** <sup>1</sup>H NMR (500 MHz, CDCl<sub>3</sub>) δ 8.70 (dd, *J* = 8.6, 5.7 Hz, 2H), 8.14 – 8.10 (m, 2H), 7.93 – 7.82 (m, 3H), 7.60 – 7.58 (m, 3H), 7.55 – 7.52 (m, 1H), 7.25 (s, 1H). <sup>13</sup>C NMR (126 MHz, CDCl<sub>3</sub>) δ 168.5, 164.7 (*J*<sub>C-F</sub> = 250.6 Hz), 159.3, 151.8, 137.6, 134.3, 133.7, 130.8 (*J*<sub>C-F</sub> = 8.6 Hz), 130.2, 130.1, 129.0, 128.6, 127.1, 121.6, 115.5 (*J*<sub>C-F</sub> = 21.6 Hz). <sup>19</sup>F NMR (471 MHz, CDCl<sub>3</sub>) δ 110.6.

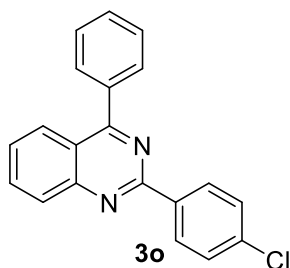

**2-(4-Chlorophenyl)-4-phenylquinazoline(3o<sup>9</sup>):** <sup>1</sup>H NMR (500 MHz, CDCl<sub>3</sub>) δ 8.66 (d, *J* = 8.5 Hz, 2H), 8.18 (d, *J* = 8.3 Hz, 1H), 8.14 (d, *J* = 8.4 Hz, 1H), 7.93 – 7.87 (m, 3H), 7.59 – 7.53 (m, 4H), 7.50 (d, *J* = 8.5 Hz, 2H). <sup>13</sup>C NMR (126 MHz, CDCl<sub>3</sub>) δ 168.5, 159.2, 151.8, 137.5, 136.8, 136.7, 133.7, 130.2, 130.1, 129.1, 128.7, 128.6, 127.3, 127.1, 121.7.



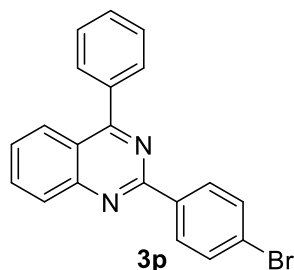

**2-(4-bromophenyl)-4-phenylquinazoline(3p<sup>4</sup>):** <sup>1</sup>H NMR (500 MHz, CDCl<sub>3</sub>) δ 8.60 – 8.57 (m, 2H), 8.20 – 8.11 (m, 2H), 7.92 – 7.85 (m, 3H), 7.67 – 7.54 (m, 6H). <sup>13</sup>C NMR (126 MHz, CDCl<sub>3</sub>) δ 168.6, 159.2, 151.7, 137.5, 137.0, 133.8, 131.7, 130.3, 130.2, 130.1, 129.0, 128.6, 127.3, 127.1, 125.4, 121.8.

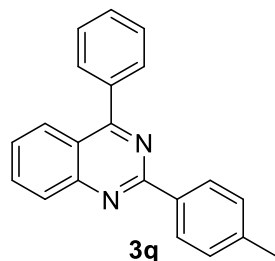

**2-(4-Methylphenyl)-4-phenylquinazoline(3q<sup>2</sup>):** <sup>1</sup>H NMR (500 MHz, CDCl<sub>3</sub>) δ 8.59 (d, *J* = 8.1 Hz, 2H), 8.13 (d, *J* = 6.0 Hz, 1H), 8.09 (d, *J* = 8.3 Hz, 1H), 7.88 – 7.83 (m, 3H), 7.59 – 7.57 (m, 3H), 7.51 – 7.48 (m, 1H), 7.32 (d, *J* = 8.0 Hz, 2H), 2.43 (s, 3H). <sup>13</sup>C NMR (126 MHz, CDCl<sub>3</sub>) δ 168.3, 160.3, 152.0, 140.8, 137.8, 135.5, 133.5, 130.2, 129.9, 129.3, 129.1, 128.7, 128.5, 127.0, 126.8, 121.6, 21.6.

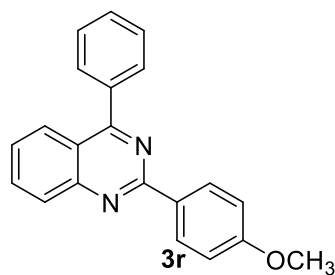

**2-(4-methoxyphenyl)-4-phenylquinazoline(3r<sup>9</sup>):** <sup>1</sup>H NMR (500 MHz, CDCl<sub>3</sub>) δ 8.68 – 8.63 (m, 2H), 8.13 – 8.04 (m, 2H), 7.90 – 7.80 (m, 3H), 7.61 – 7.54 (m, 3H), 7.47 (m, 1H), 7.05 – 7.01 (m, 2H), 3.88 (d, *J* = 8.3 Hz, 3H). <sup>13</sup>C NMR (126 MHz, CDCl<sub>3</sub>) δ 168.2, 161.8, 160.1, 152.1, 137.8, 133.5, 130.9, 130.4, 130.2, 129.9, 129.0, 128.5, 127.0, 126.6, 121.4, 113.9, 55.4.

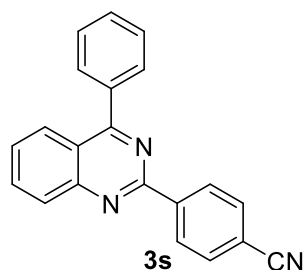

**4-(4-phenylquinazolin-2-yl)benzonitrile(3s<sup>8</sup>):** <sup>1</sup>H NMR (500 MHz, CDCl<sub>3</sub>) δ 8.81 (d, *J* = 8.4 Hz, 2H), 8.19–8.15 (m, 2H), 7.96 – 7.90 (m, 1H), 7.90 – 7.85 (m, 2H), 7.79 (d, *J* = 6.3 Hz, 1H), 7.65 – 7.58 (m, 4H). <sup>13</sup>C NMR (126 MHz, CDCl<sub>3</sub>) δ 168.8, 158.2, 151.7, 142.2, 137.3, 134.1, 132.3, 130.3, 130.2, 129.3, 129.1, 128.7, 128.0, 127.2, 127.0, 119.0, 113.7.

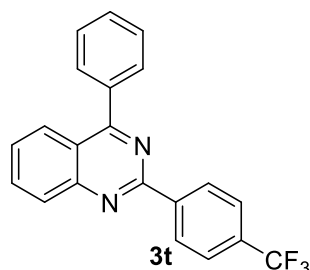

**4-Phenyl-2-(4-(trifluoromethyl)phenyl)quinazoline(3t<sup>10</sup>):** <sup>1</sup>H NMR (500 MHz, CDCl<sub>3</sub>) δ 8.79 (d, *J* = 8.1 Hz, 2H), 8.18 – 8.08 (m, 2H), 7.85 (d, *J* = 3.5 Hz, 3H), 7.74 (d, *J* = 8.2 Hz, 2H), 7.59 – 7.54 (m, 4H). <sup>13</sup>C NMR (126 MHz, CDCl<sub>3</sub>) δ 168.6, 158.6, 151.9, 141.5, 137.4, 133.8, 132.0 (*J*<sub>C-F</sub> = 32.9 Hz), 130.2, 130.1, 129.3, 128.9, 128.6, 127.6, 127.1, 125.5, 125.4 (*J*<sub>C-F</sub> = 10.7 Hz), 124.8 (*J*<sub>C-F</sub> = 280.0 Hz). <sup>19</sup>F (471 MHz, CDCl<sub>3</sub>) δ 62.5.

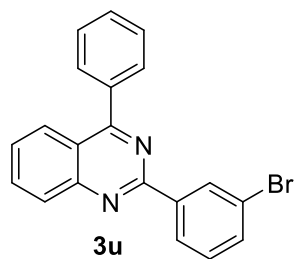

**2-(3-bromophenyl)-4-phenylquinazoline(3u<sup>2</sup>):** <sup>1</sup>H NMR (500 MHz, CDCl<sub>3</sub>) δ 8.85 (s, 1H), 8.64 (d, *J* = 7.8 Hz, 2H), 8.16 – 8.12 (m, 2H), 7.91 – 7.86 (m, 3H), 7.62 – 7.59 (m, 4H), 7.58 – 7.55 (m, 1H), 7.40 – 7.37 (m, 1H). <sup>13</sup>C NMR (126 MHz, CDCl<sub>3</sub>) δ 168.6, 158.7, 151.8, 140.3, 137.4, 133.8, 133.4, 131.6, 130.2, 130.12, 130.09, 129.2, 128.6, 127.5, 127.3, 127.1, 122.9, 121.9.

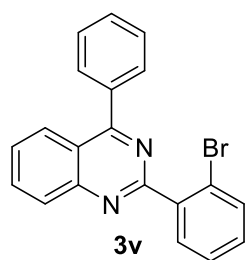

**2-(2-bromophenyl)-4-phenylquinazoline(3v<sup>12</sup>):** <sup>1</sup>H NMR (500 MHz, CDCl<sub>3</sub>) δ 8.50 (d, *J* = 8.6 Hz, 2H), 8.10 – 8.03 (m, 2H), 7.83 – 7.79 (m, 3H), 7.57 (d, *J* = 8.5 Hz, 2H), 7.54 – 7.52 (m, 3H), 7.50 – 7.47 (m, 1H). <sup>13</sup>C NMR (126 MHz, CDCl<sub>3</sub>) δ 167.5, 158.2, 150.7, 136.4, 136.0, 132.7, 130.8, 129.9, 129.2, 129.1, 129.0, 128.0, 127.8, 127.6, 126.3, 126.1, 124.3, 120.7.

## Part IV NMR Spectra

### 3a <sup>1</sup>H NMR

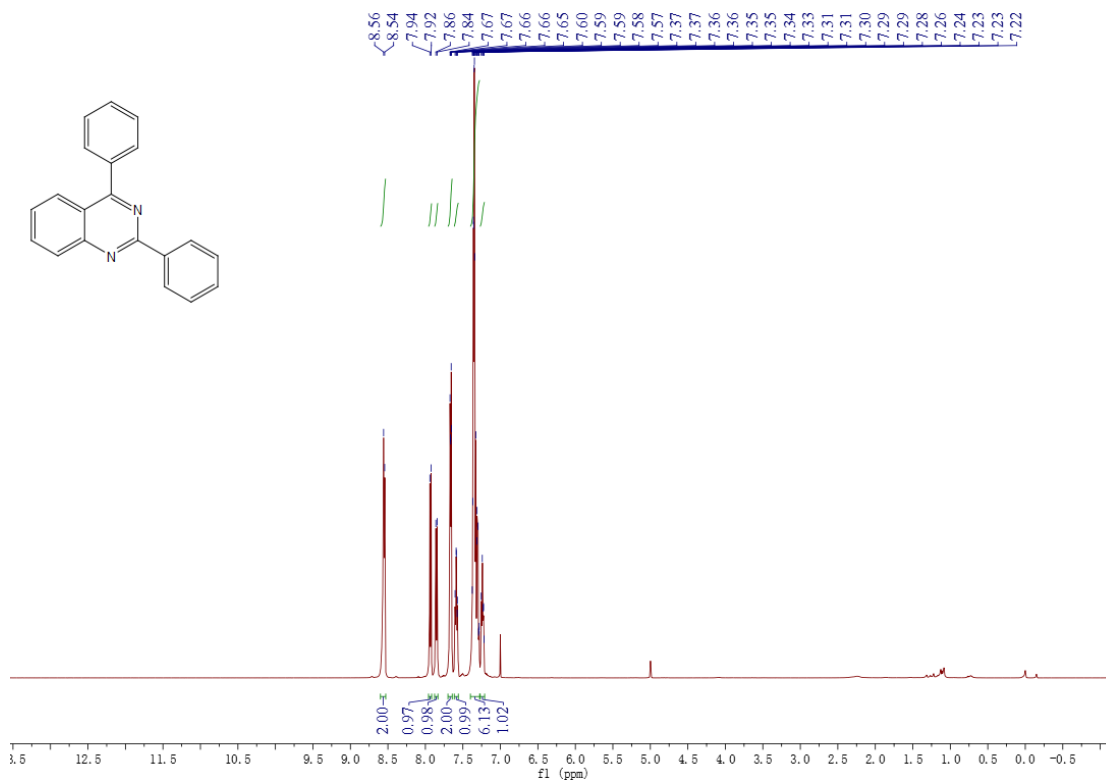

### 3a <sup>13</sup>C NMR

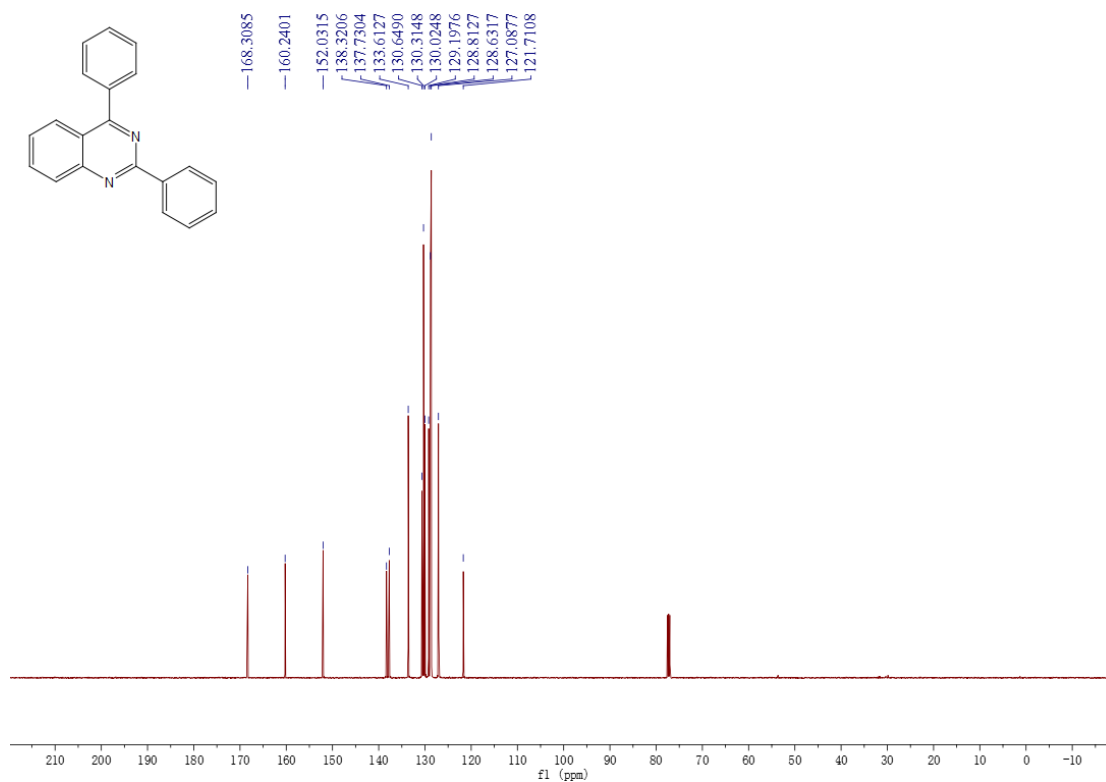

### 3b <sup>1</sup>H NMR

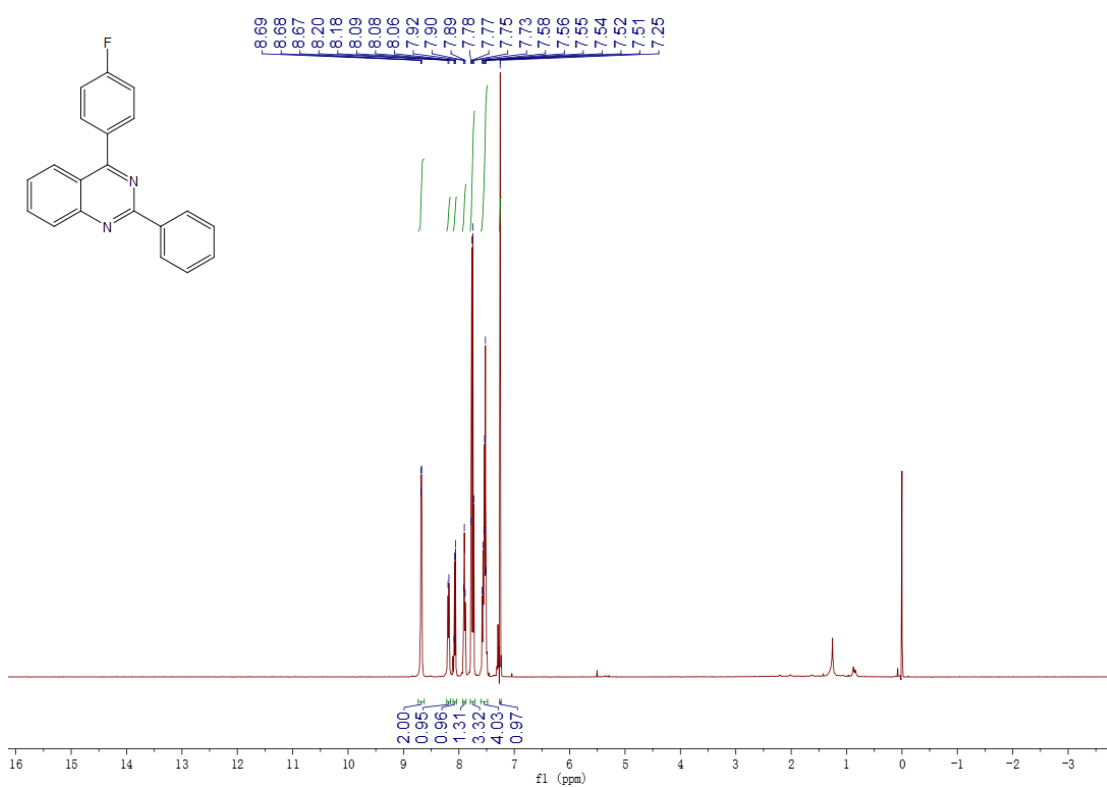

### 3b <sup>13</sup>C NMR

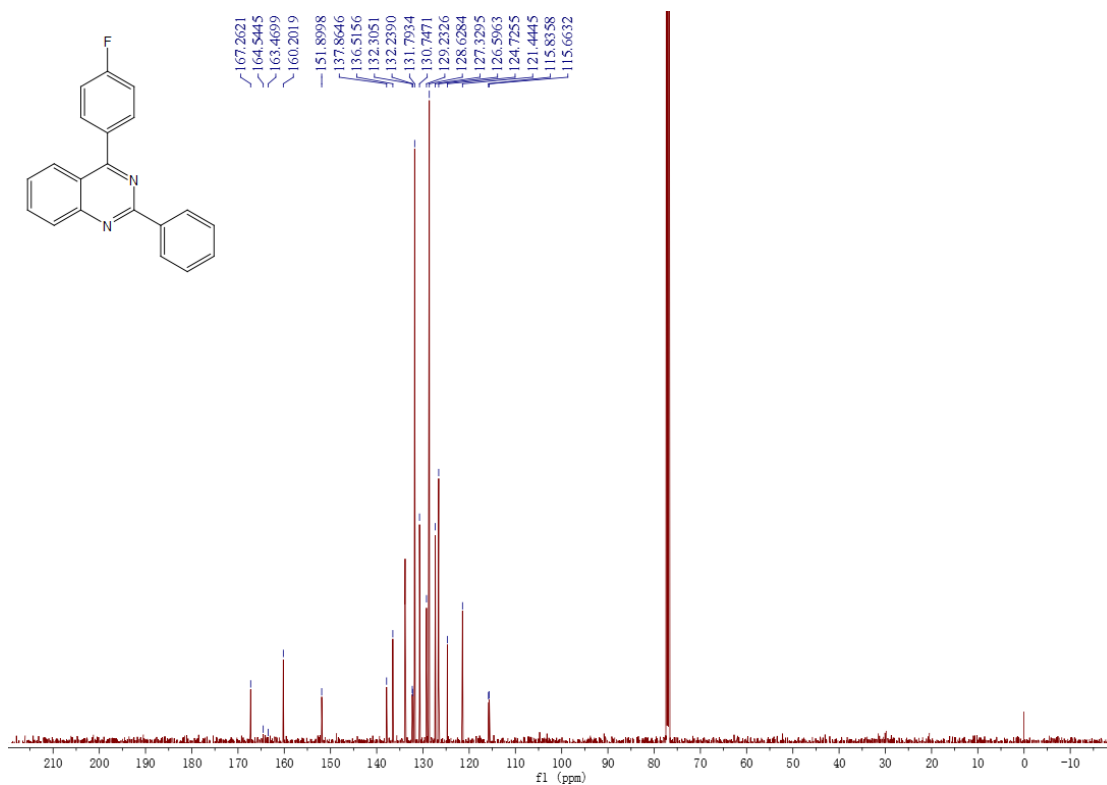

### 3b <sup>19</sup>F NMR

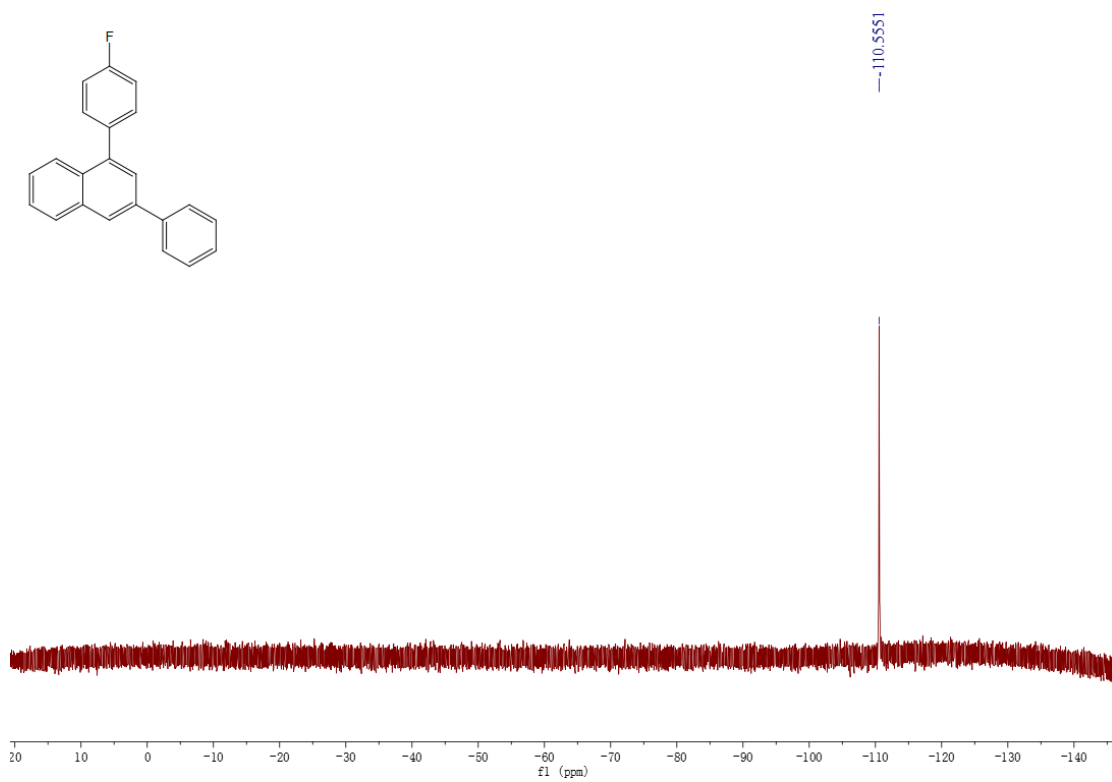

### 3c <sup>1</sup>H NMR

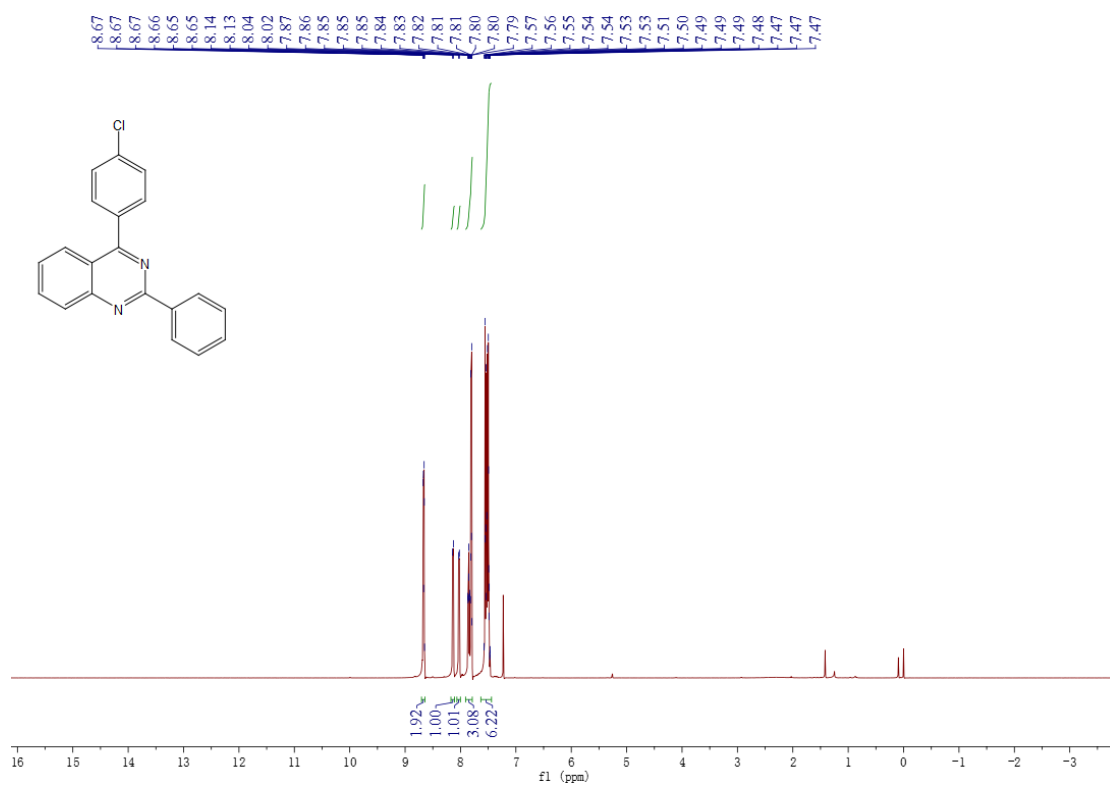

### 3c <sup>13</sup>C NMR

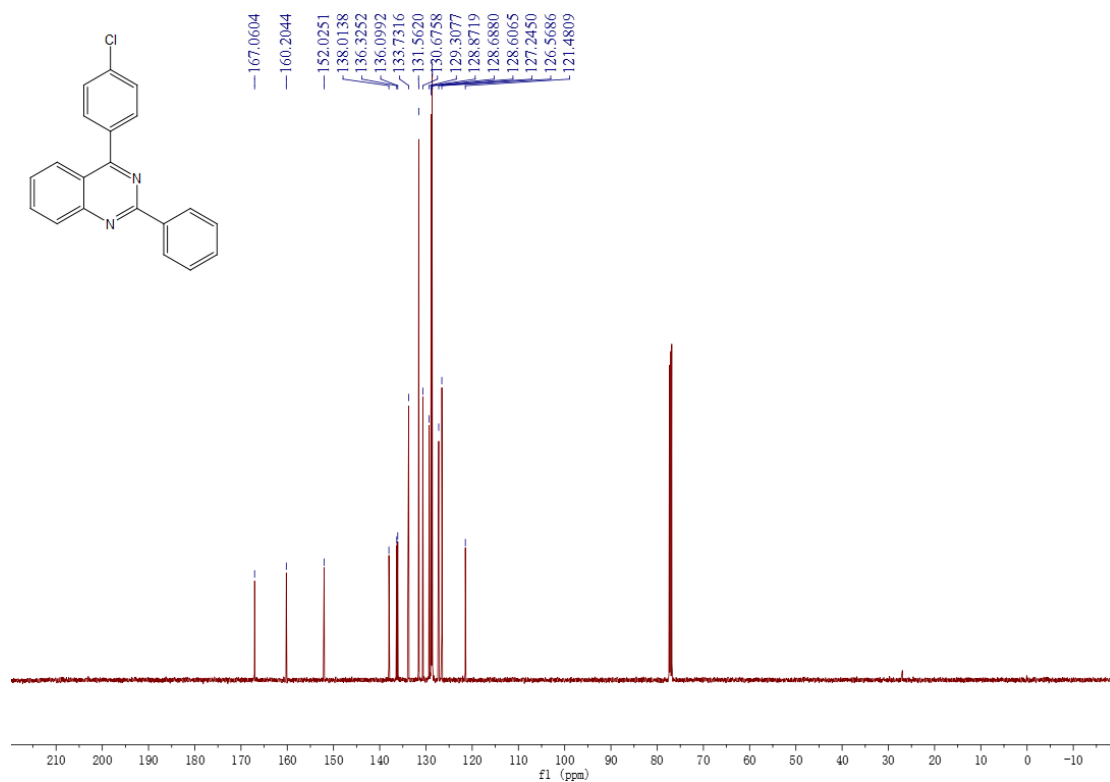

### 3d <sup>1</sup>H NMR

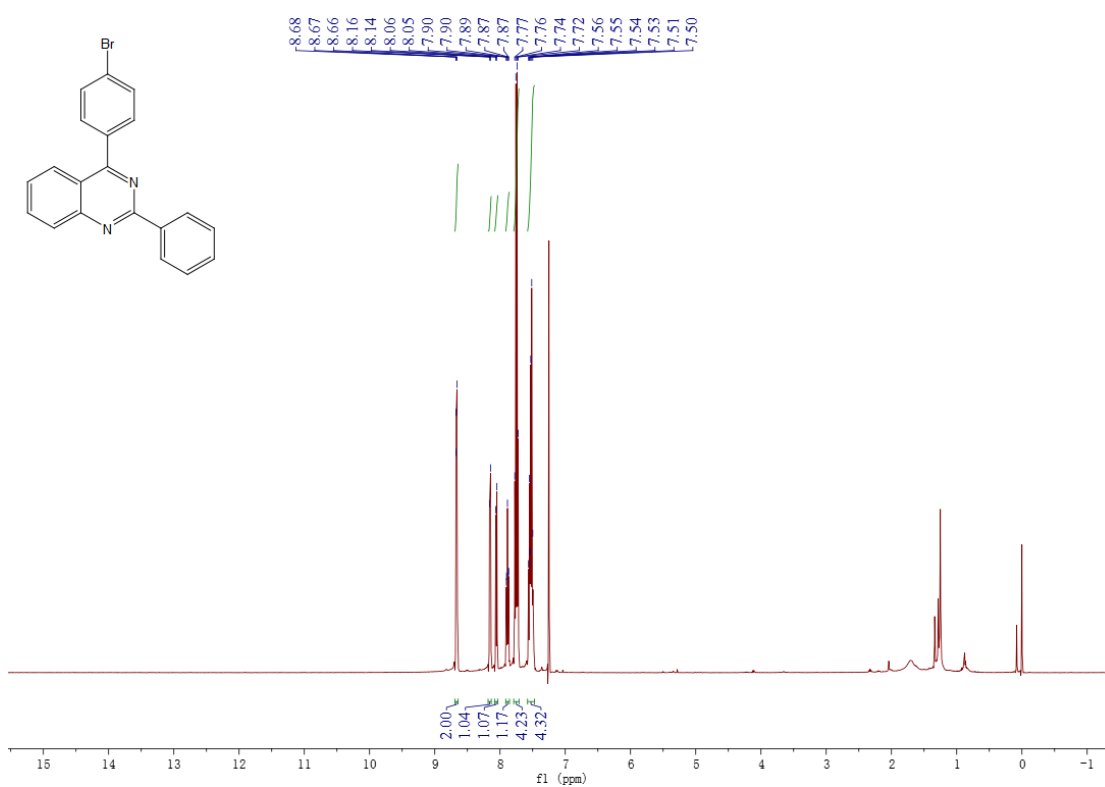

### 3d <sup>13</sup>C NMR

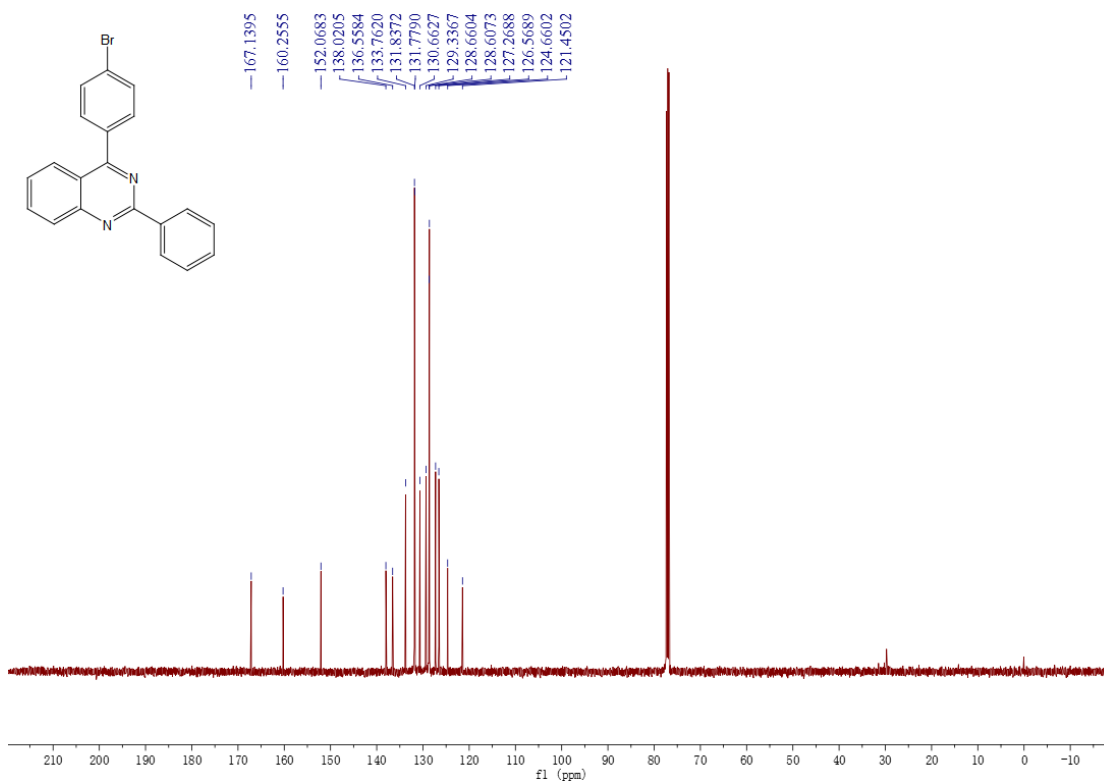

### 3e <sup>1</sup>H NMR

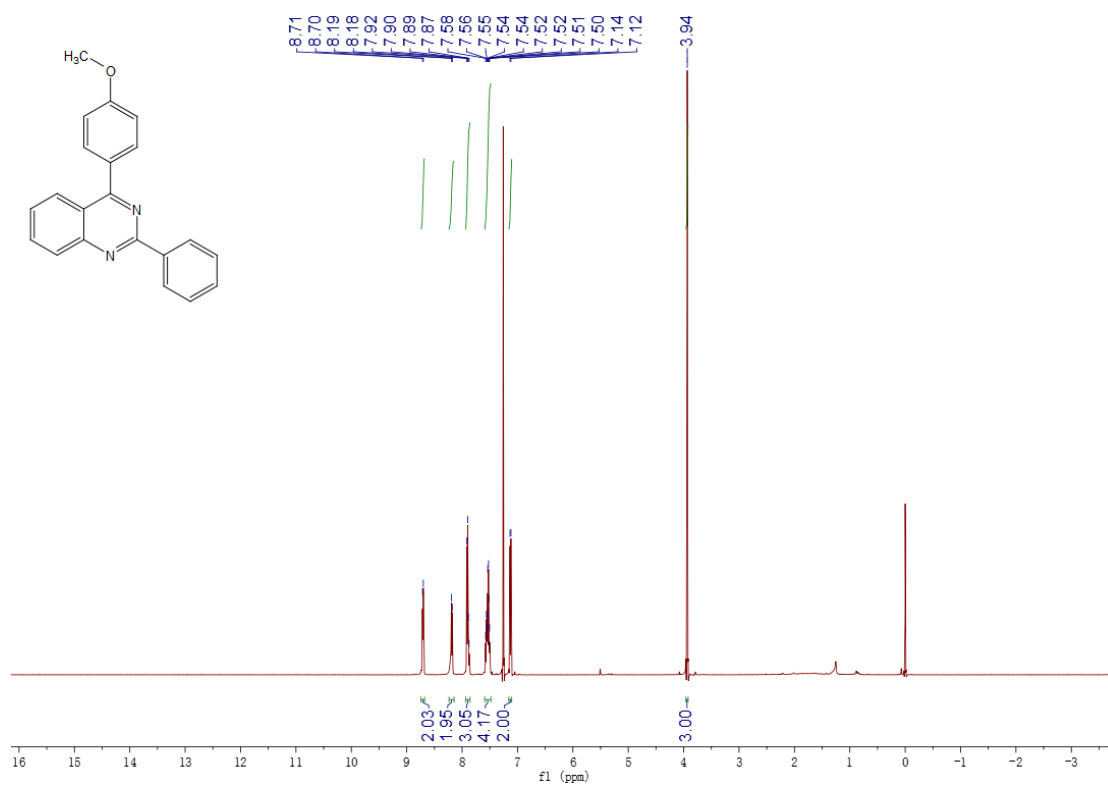

### 3e <sup>13</sup>C NMR

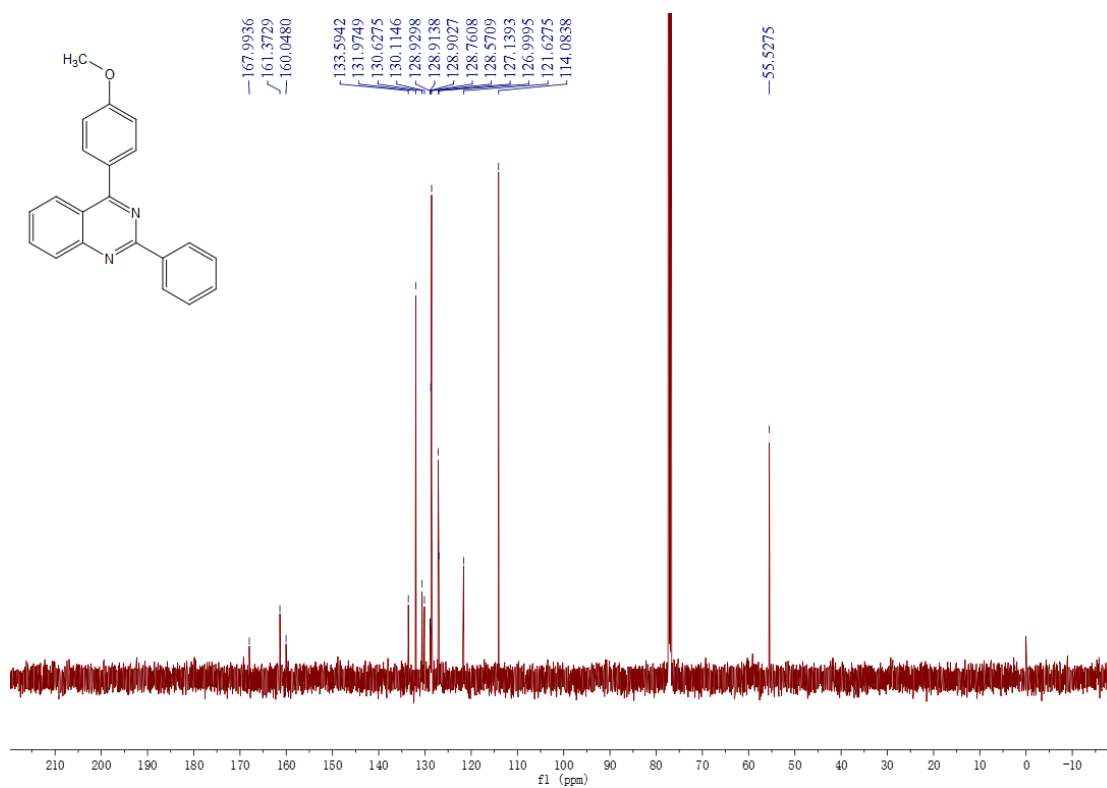



### 3f <sup>1</sup>H NMR

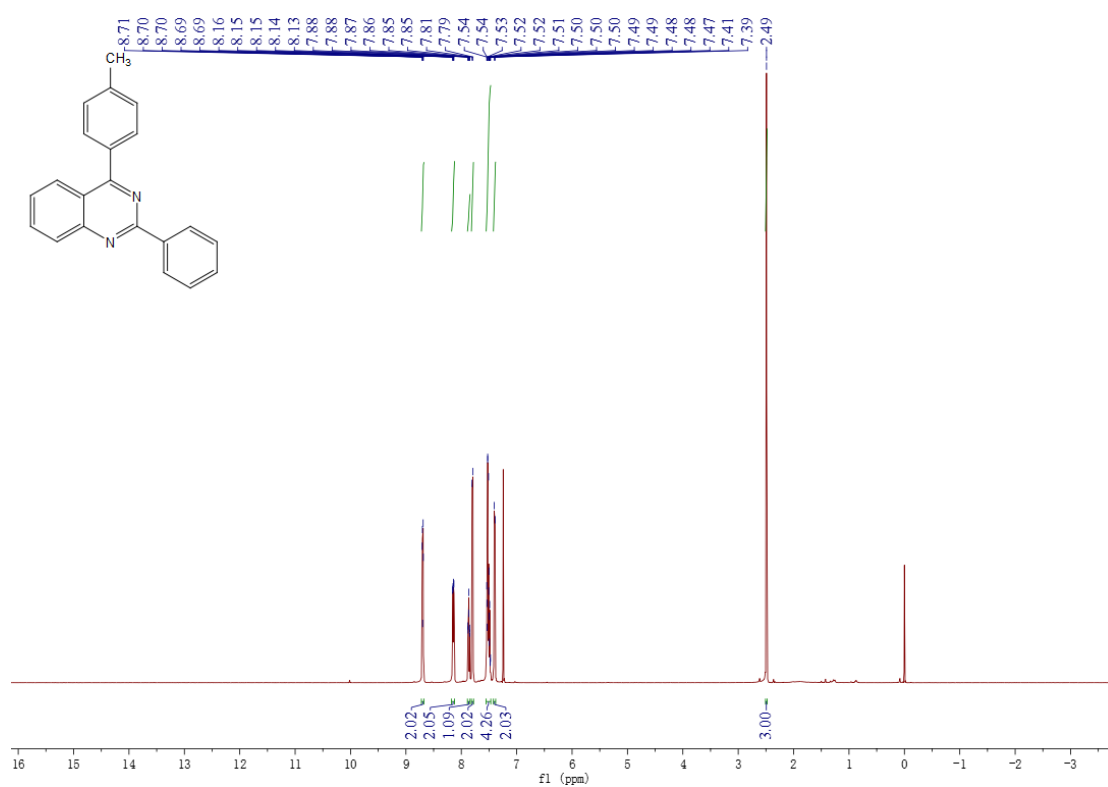

### 3f <sup>13</sup>C NMR

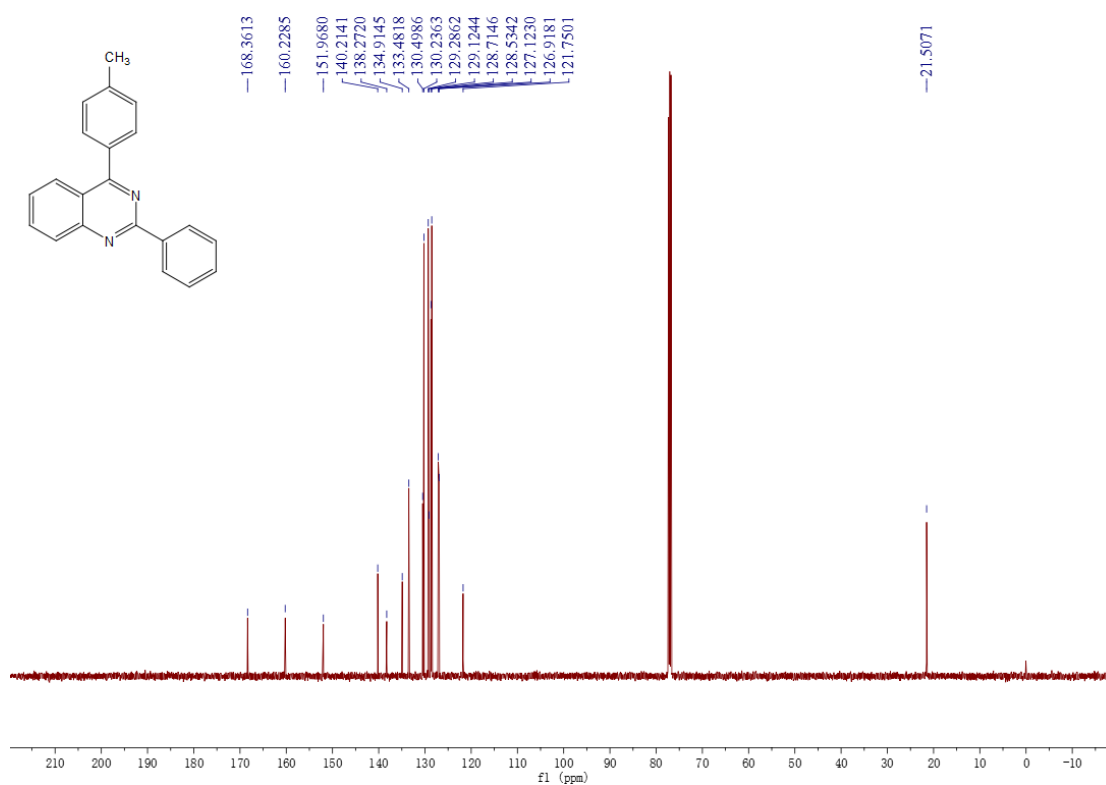

### 3g <sup>1</sup>H NMR

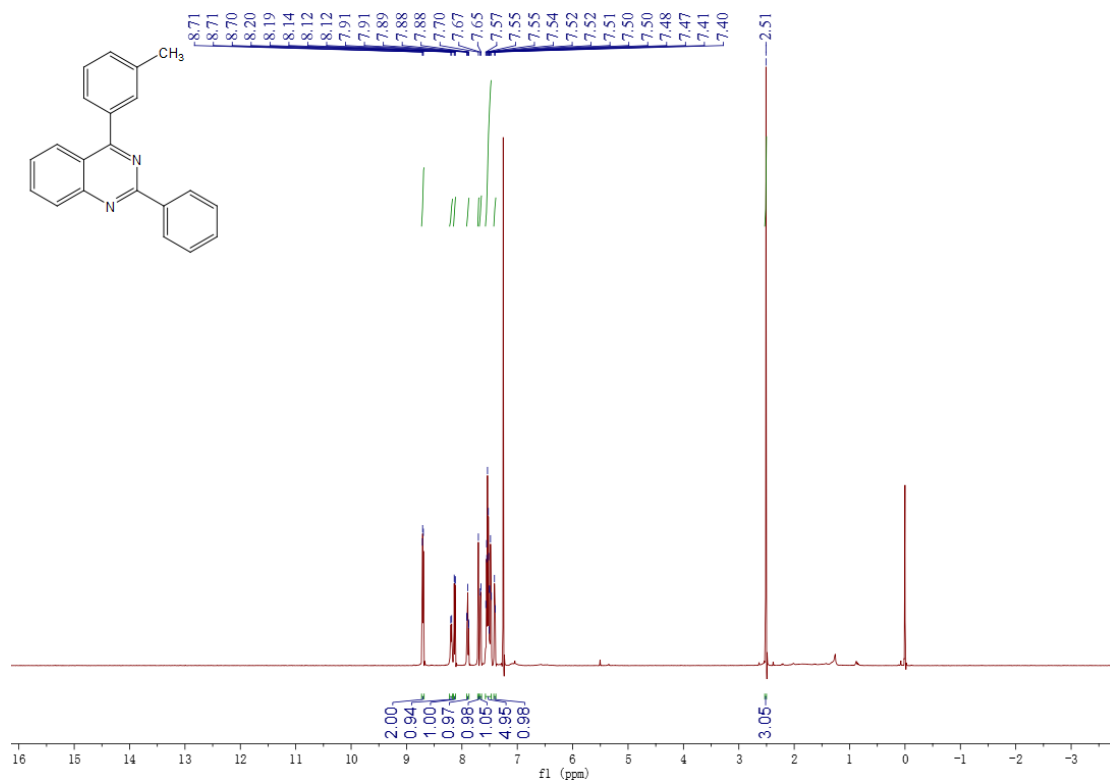

### 3g <sup>13</sup>C NMR

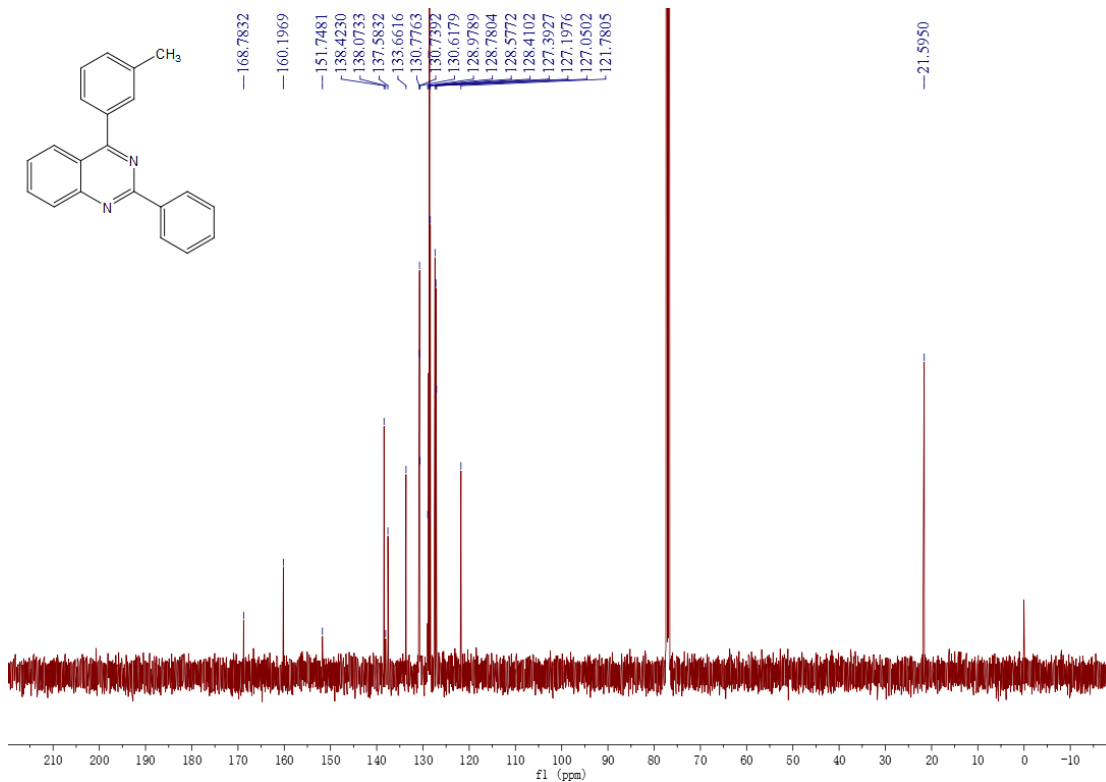

### 3h <sup>1</sup>H NMR

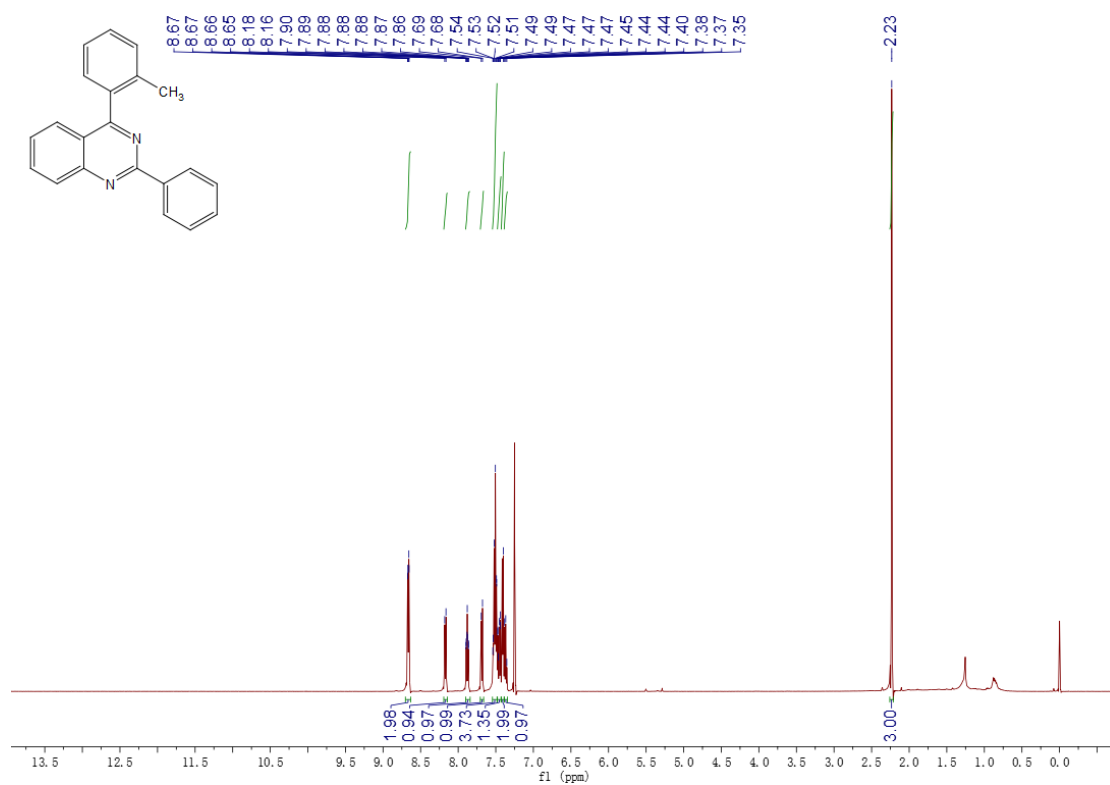

### 3h <sup>13</sup>C NMR

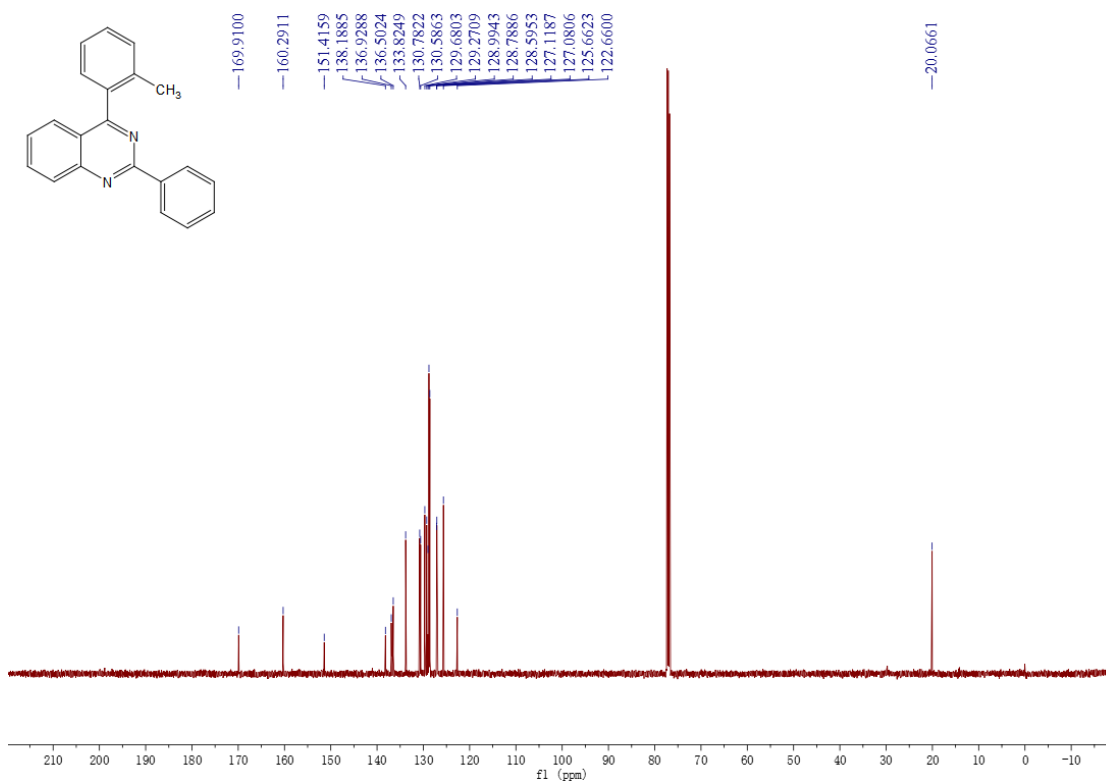

### 3i <sup>1</sup>H NMR

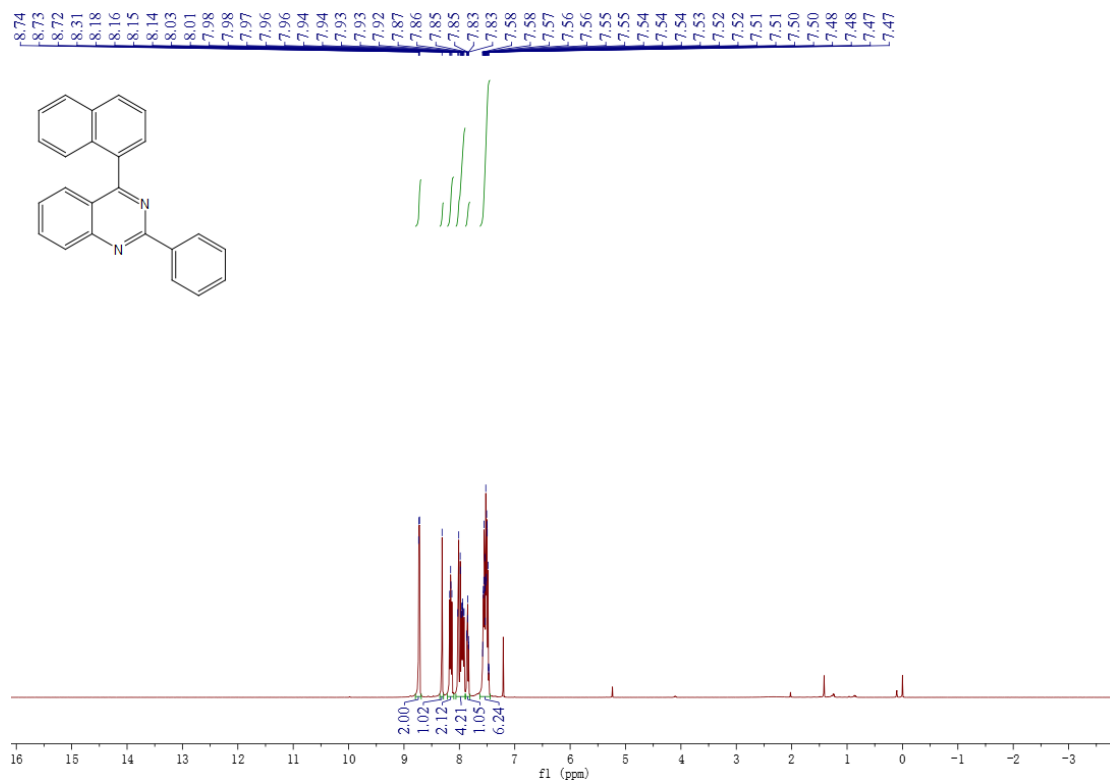

### 3i <sup>13</sup>C NMR

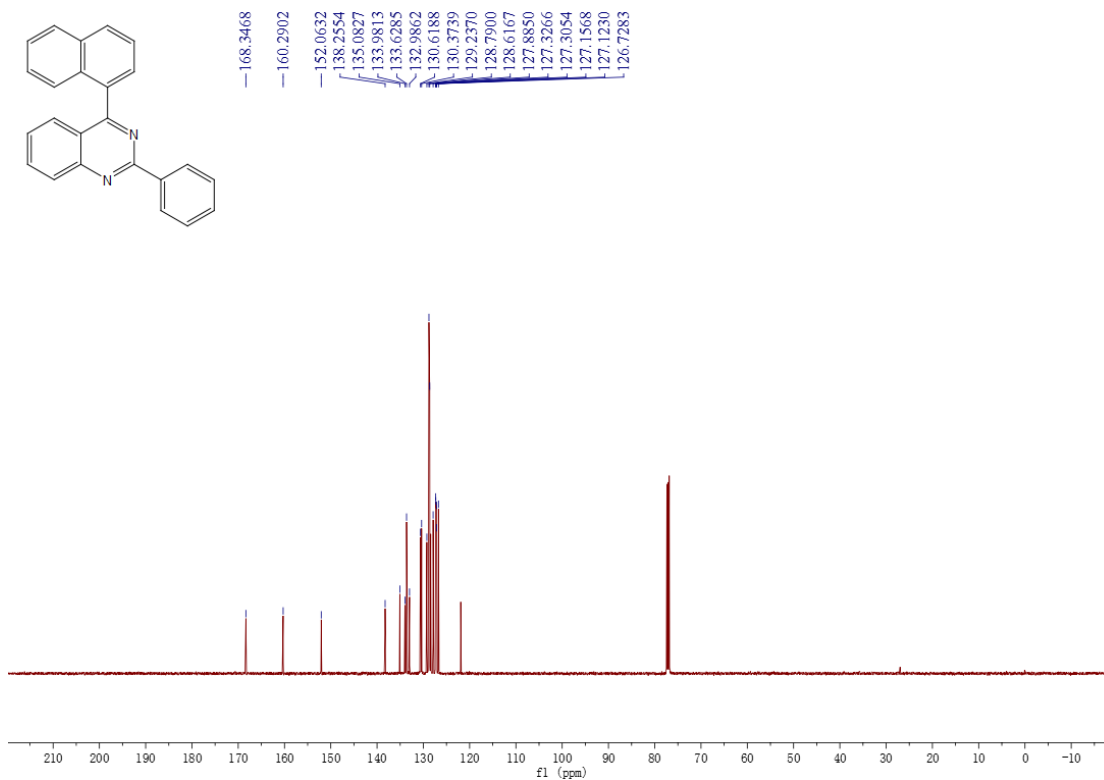

### 3j <sup>1</sup>H NMR

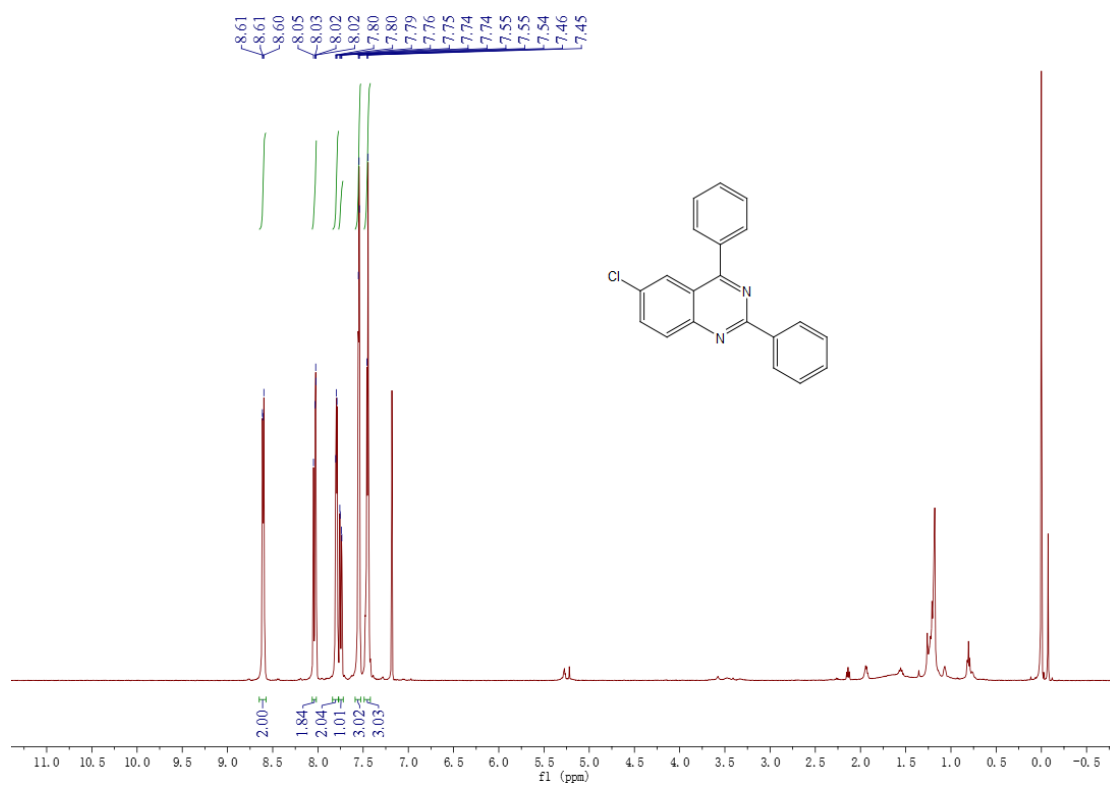

### 3j <sup>13</sup>C NMR

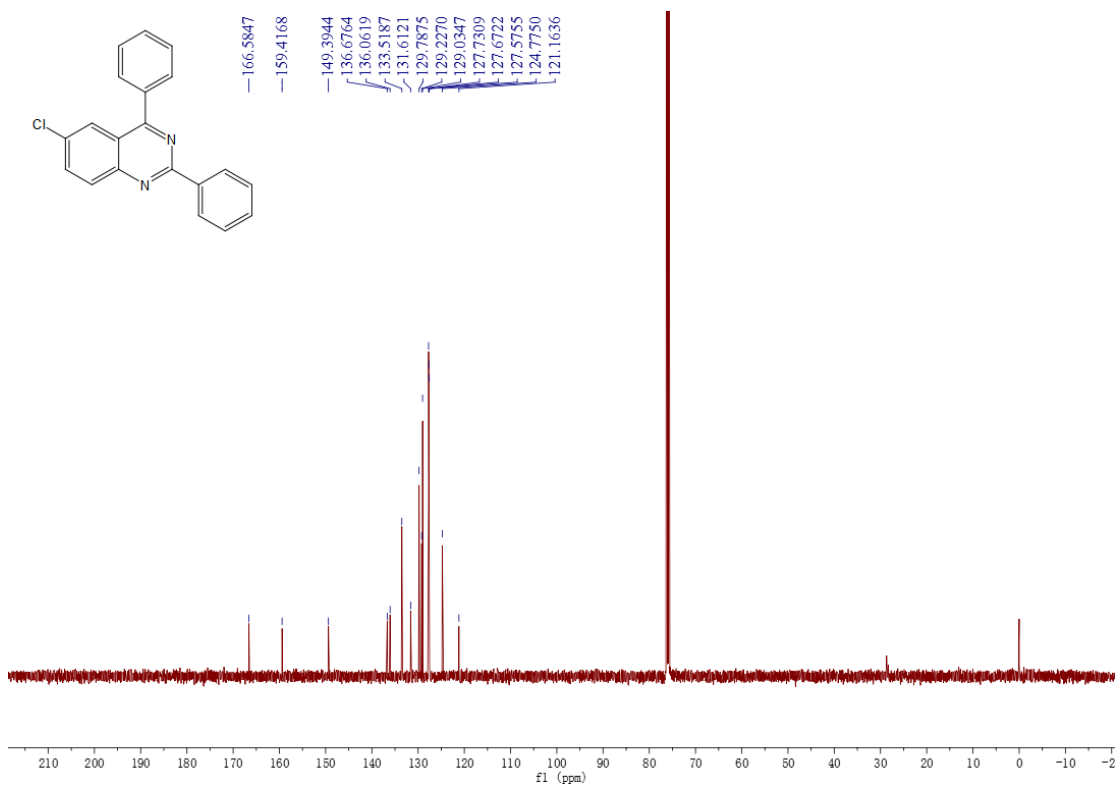

### 3k <sup>1</sup>H NMR

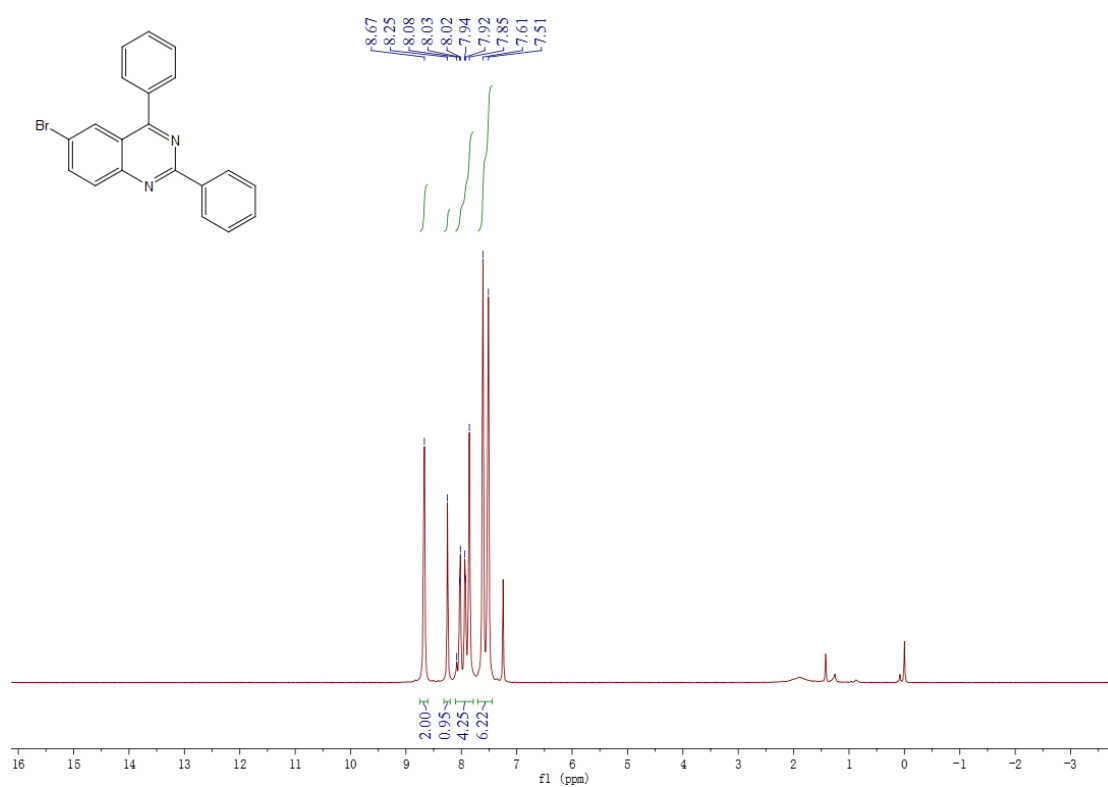

### 3k <sup>13</sup>C NMR

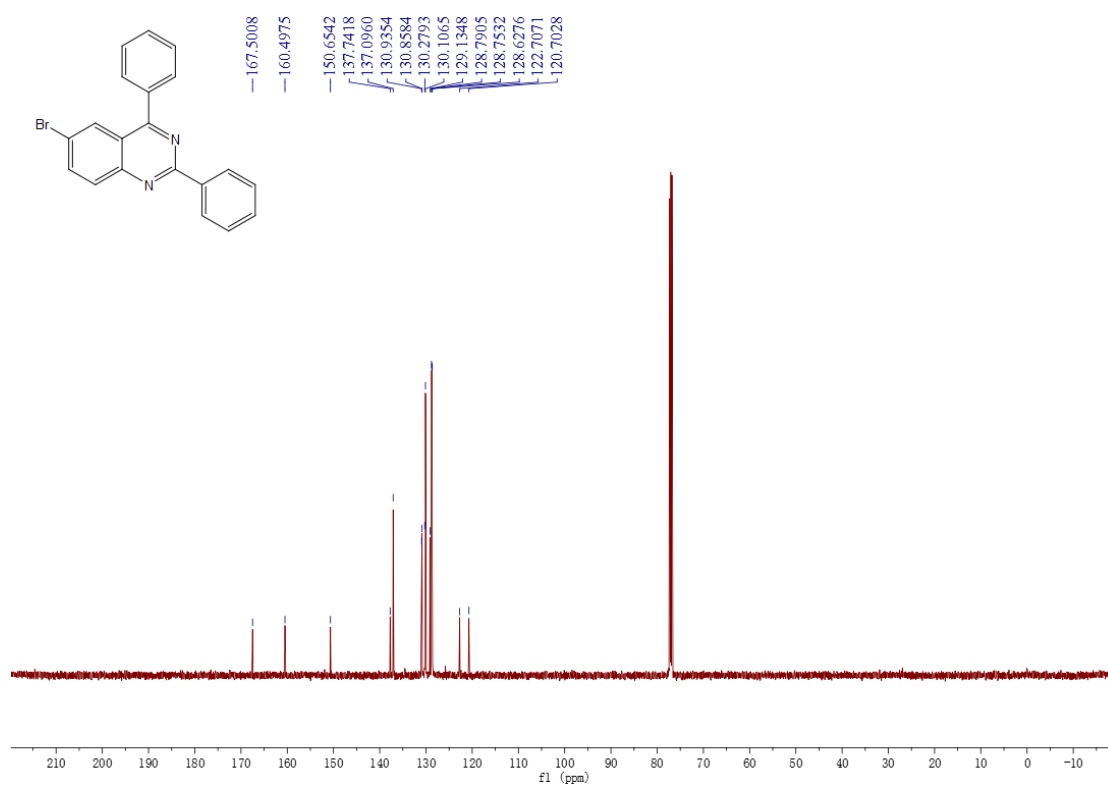

### $^1\text{H}$ NMR

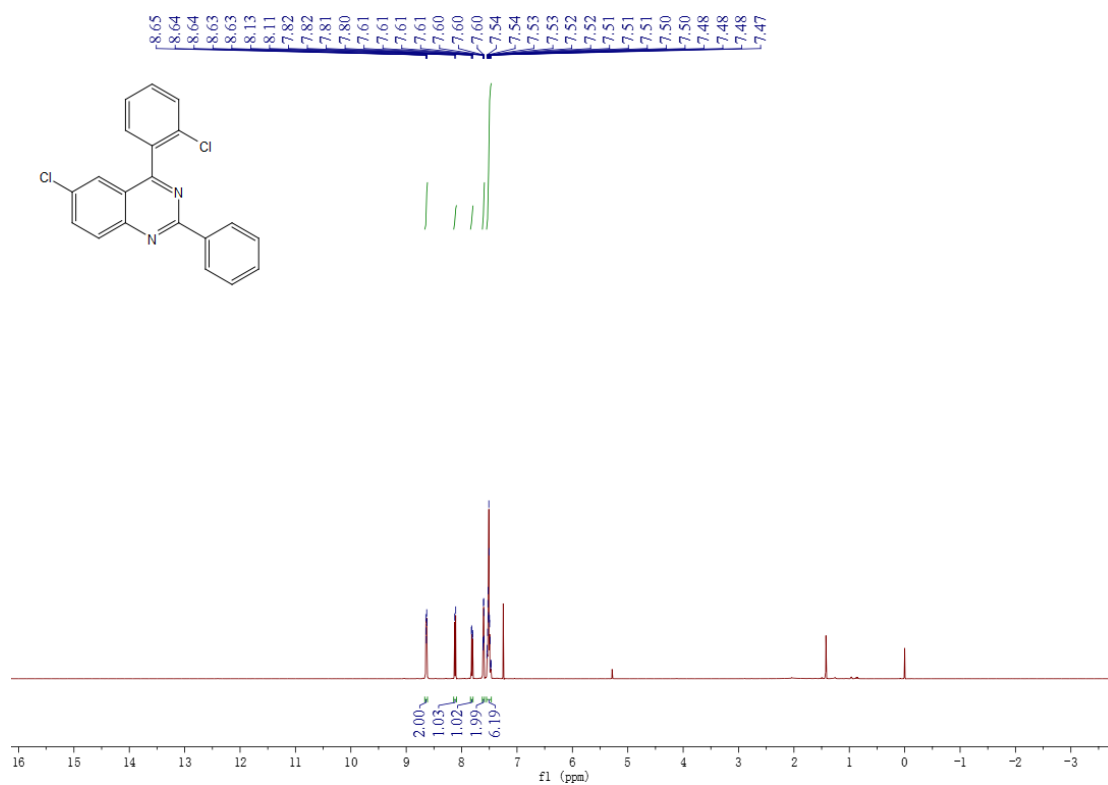

### $^{13}\text{C}$ NMR

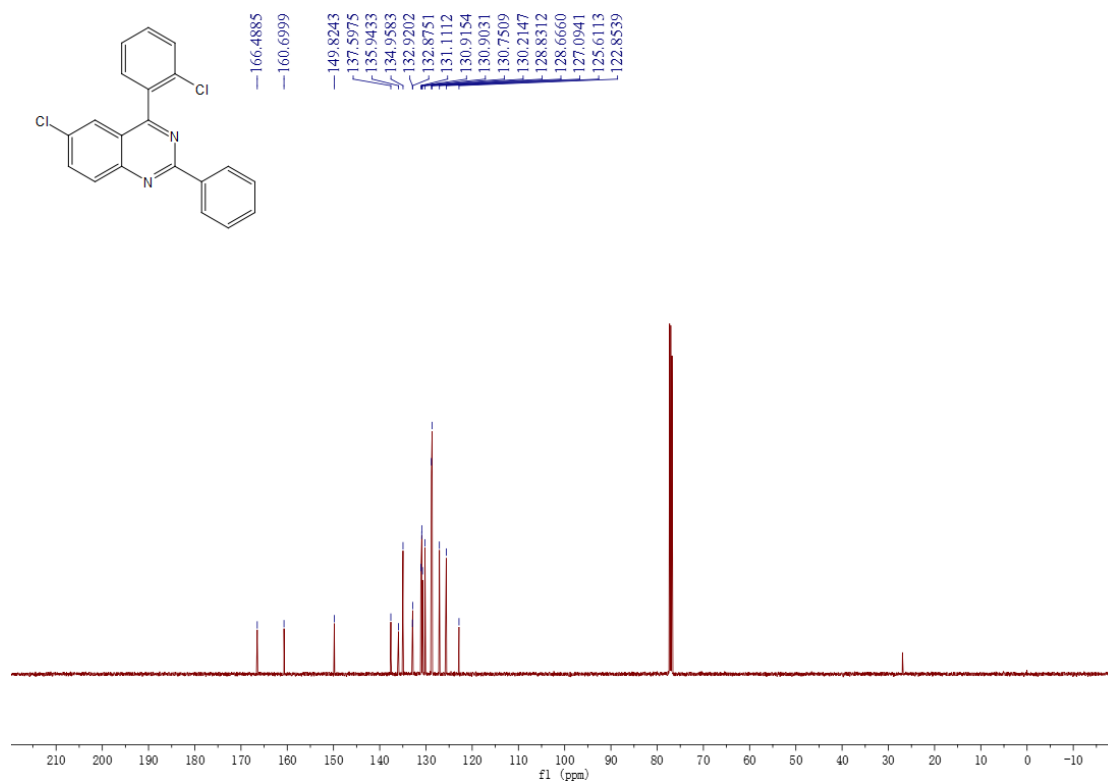





### 3n <sup>1</sup>H NMR

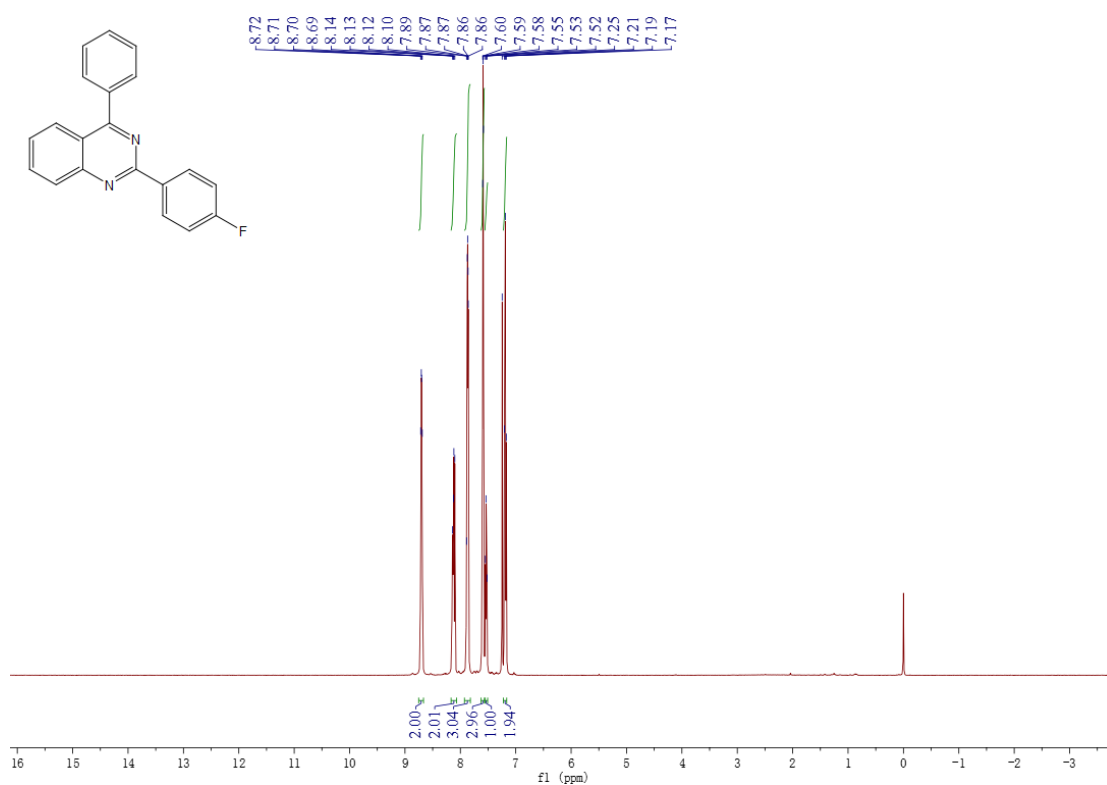

### 3n <sup>13</sup>C NMR

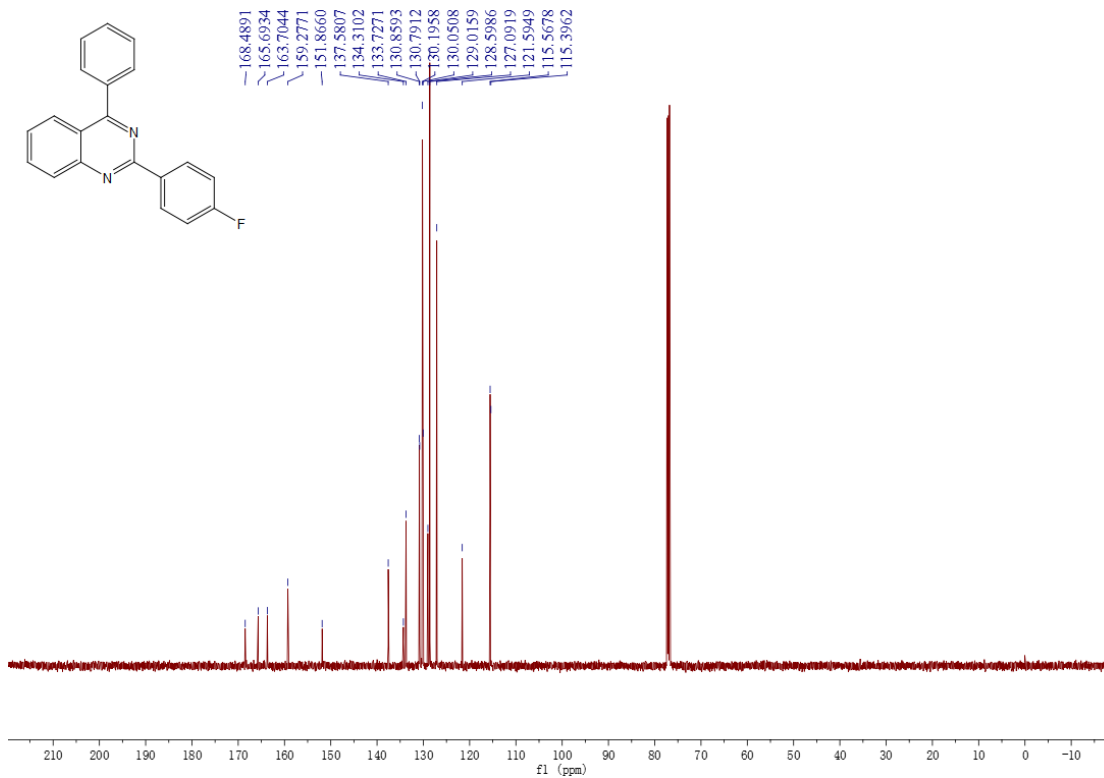

**3n <sup>19</sup>F NMR**

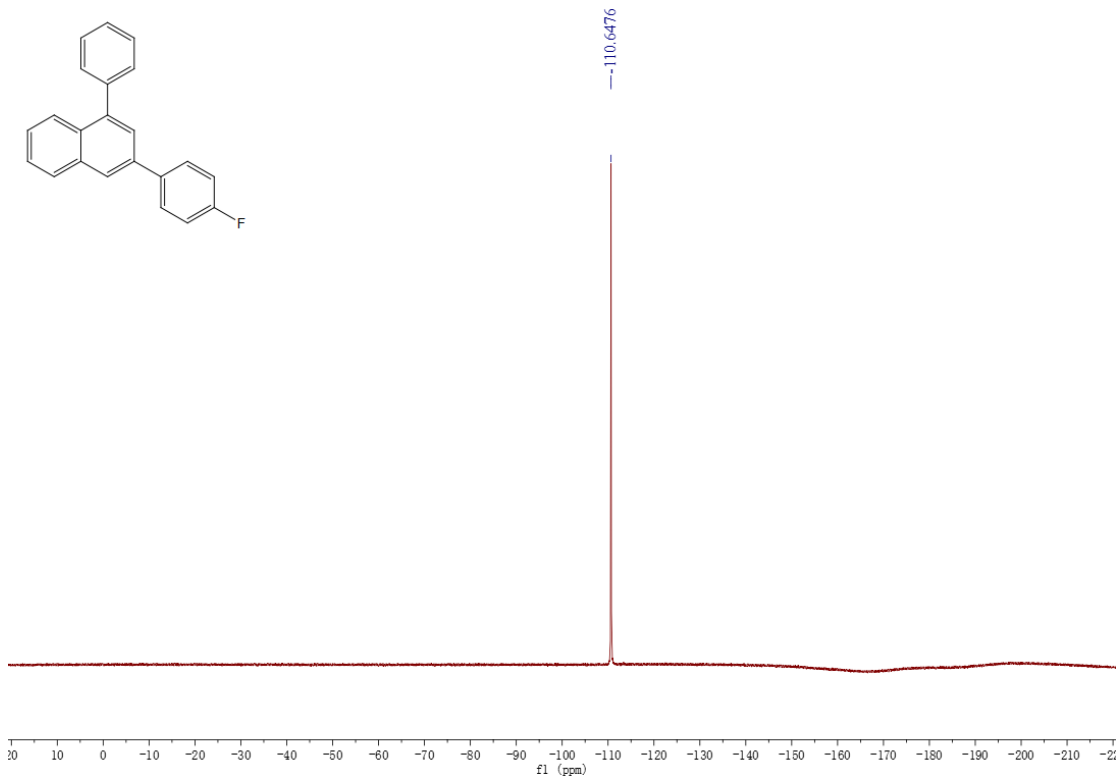

### 3o <sup>1</sup>H NMR

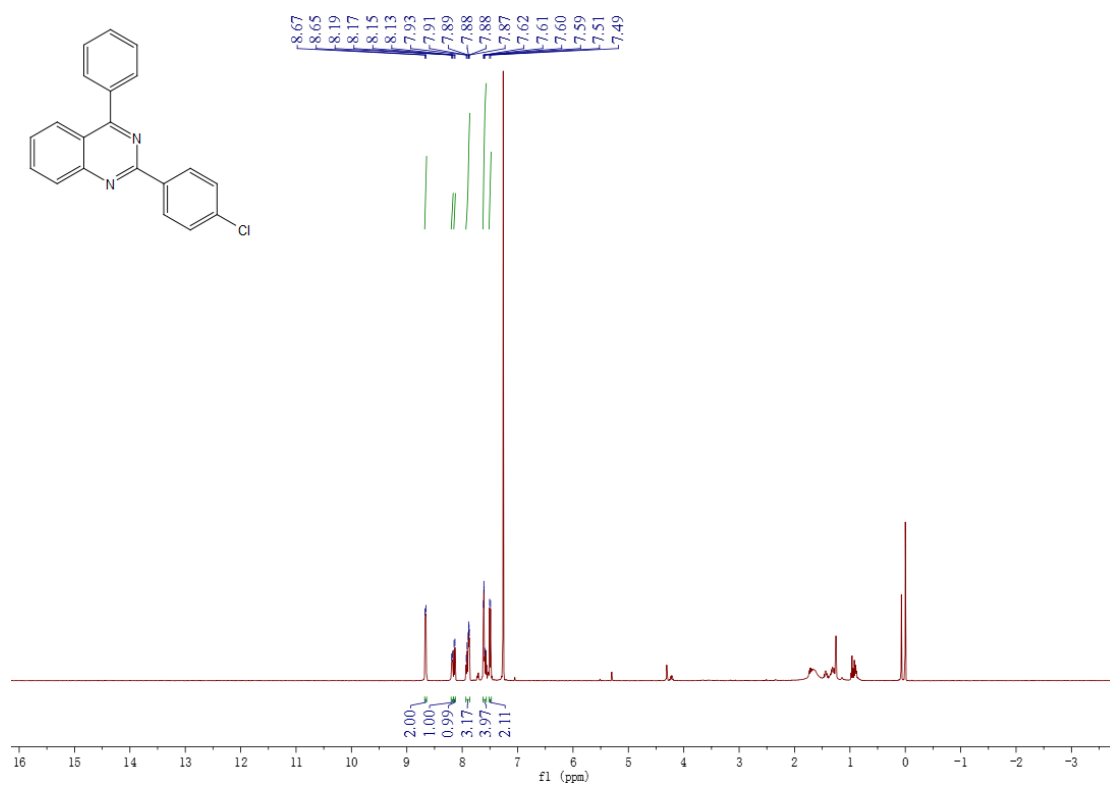

### 3o <sup>13</sup>C NMR

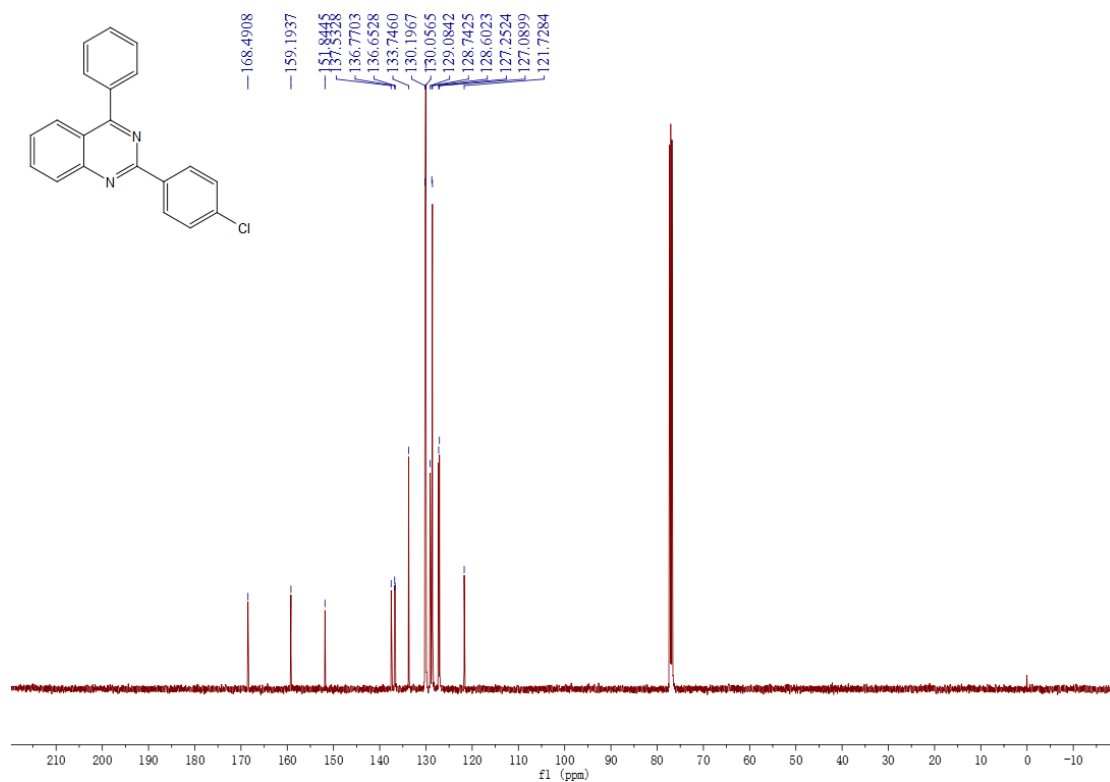

**3p <sup>1</sup>H NMR**

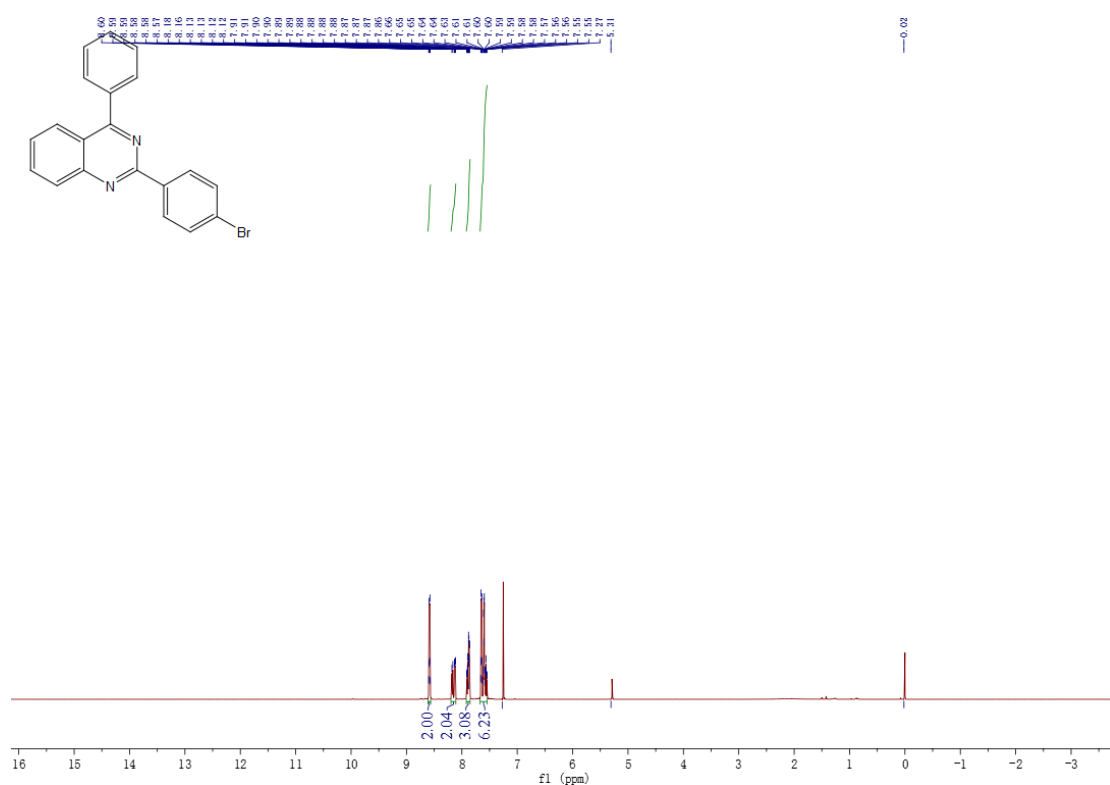

**3p <sup>13</sup>C NMR**

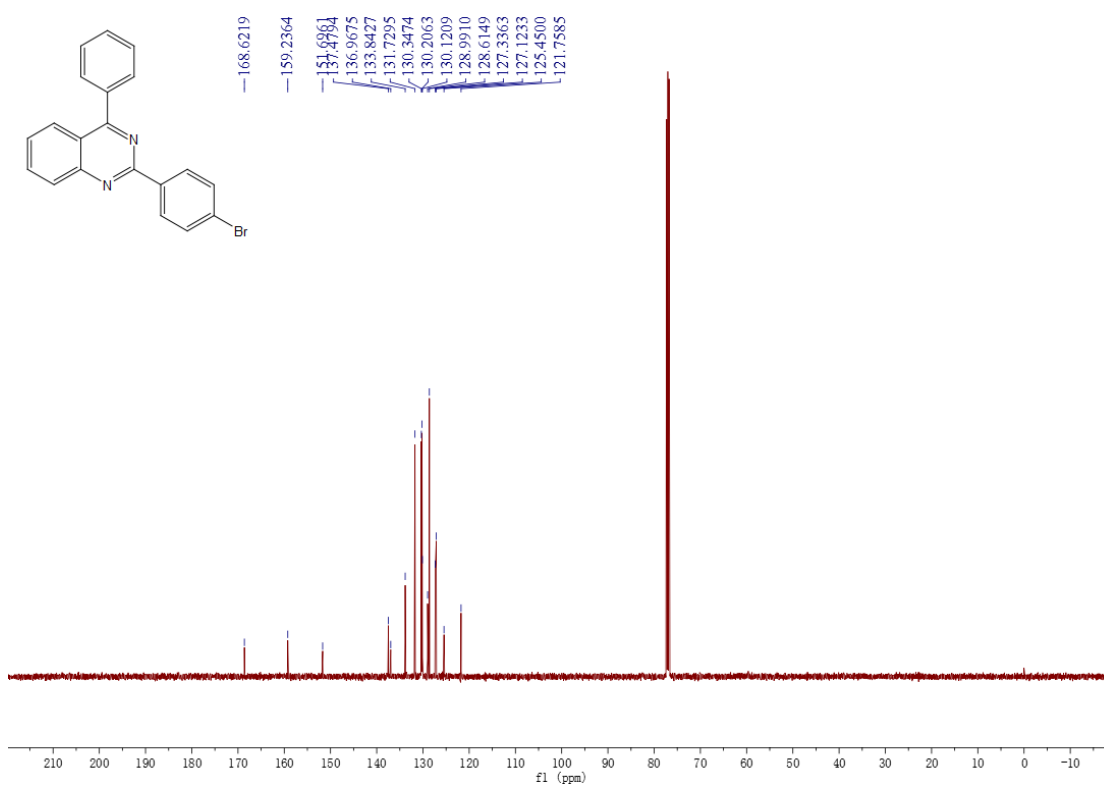

### 3q <sup>1</sup>H NMR

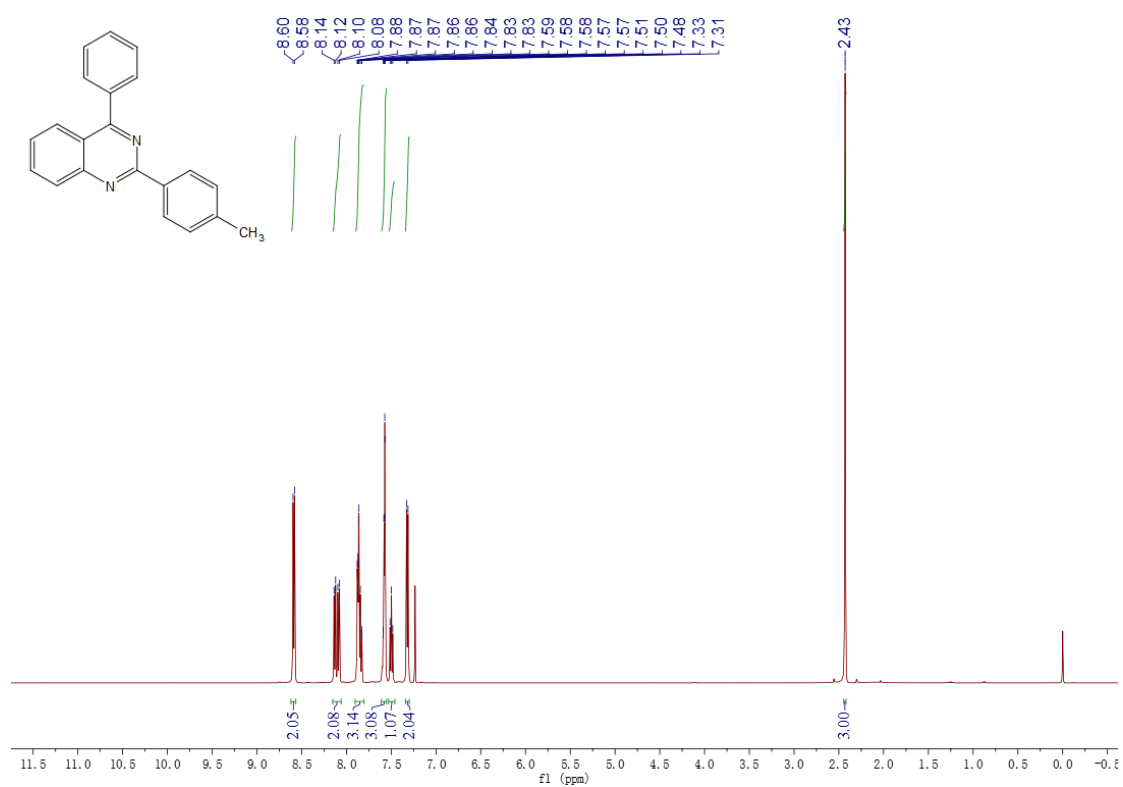

### 3q <sup>13</sup>C NMR

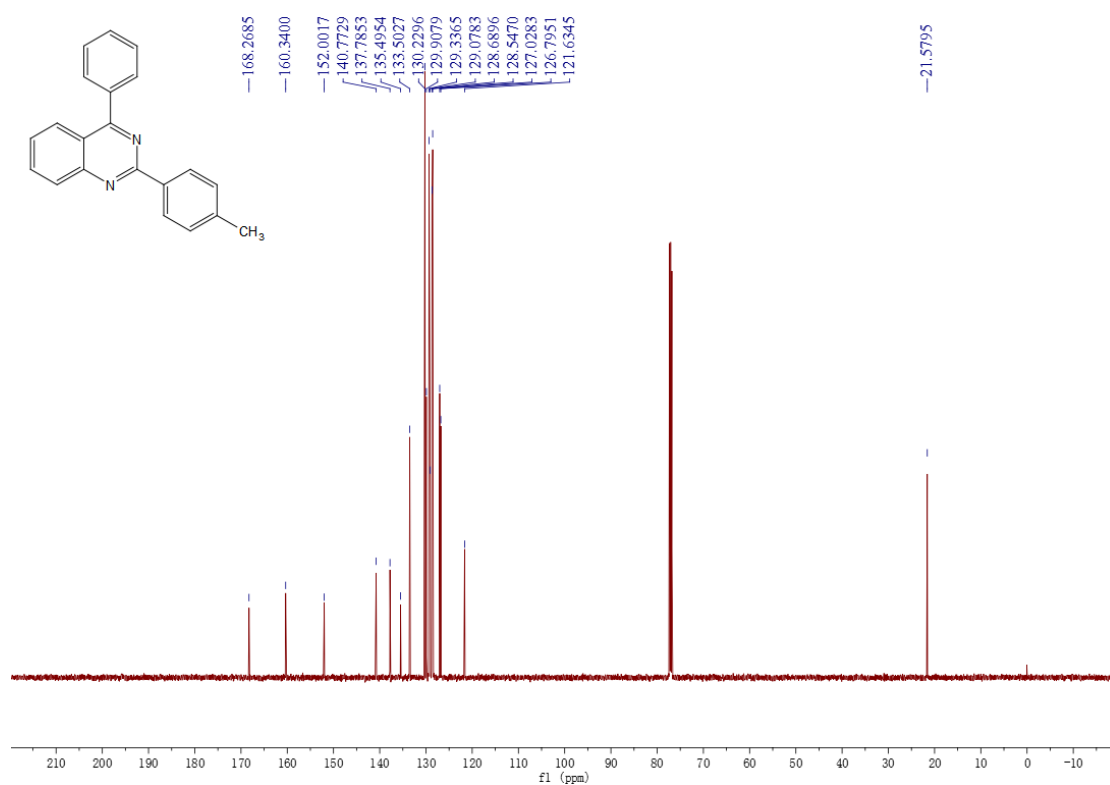

### 3r <sup>1</sup>H NMR

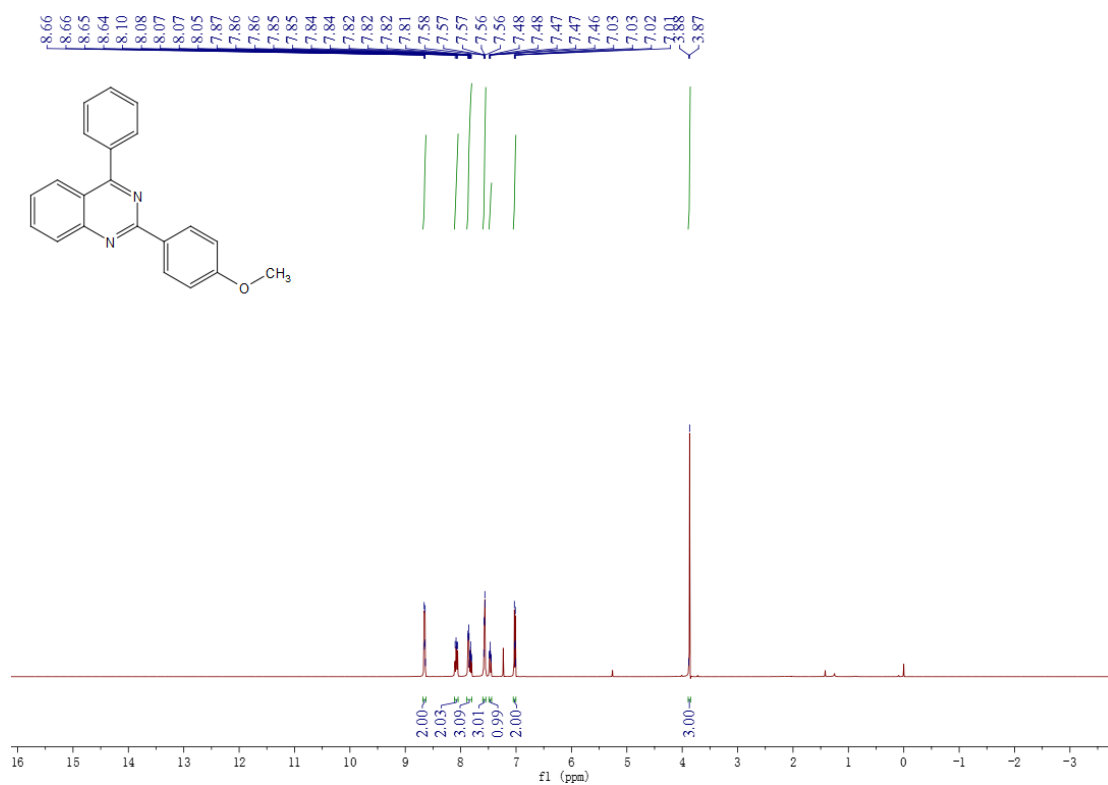

### 3r <sup>13</sup>C NMR

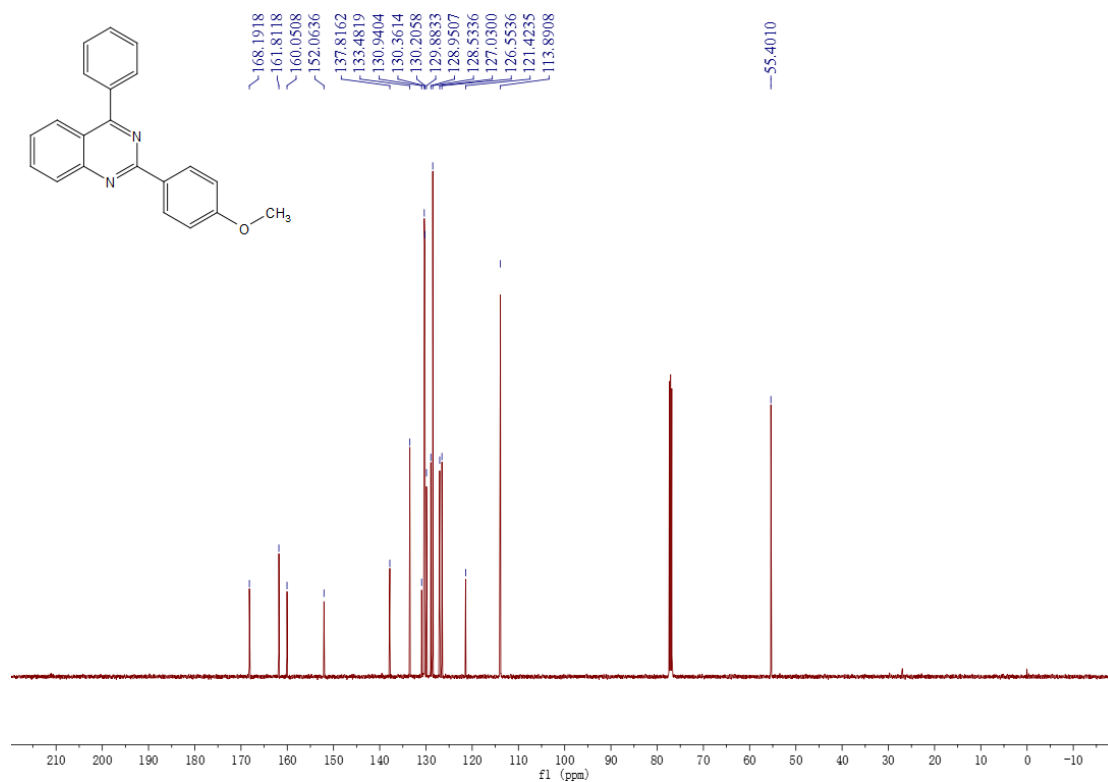

### 3s <sup>1</sup>H NMR

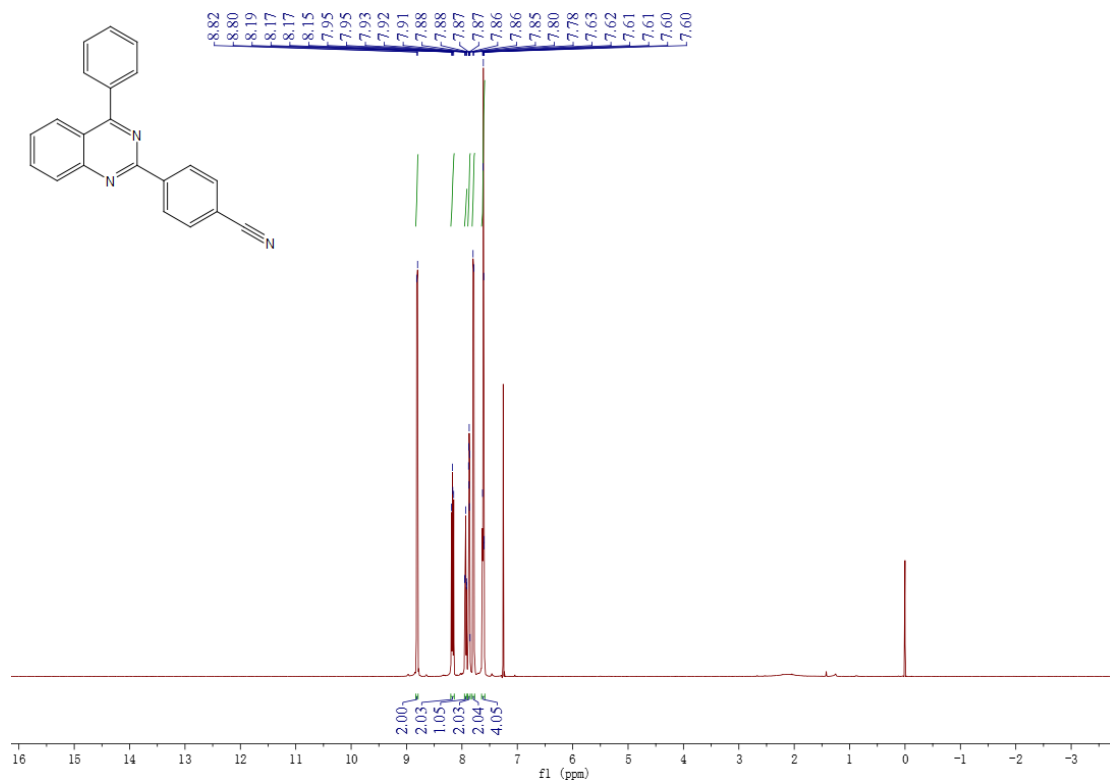

### 3s <sup>13</sup>C NMR

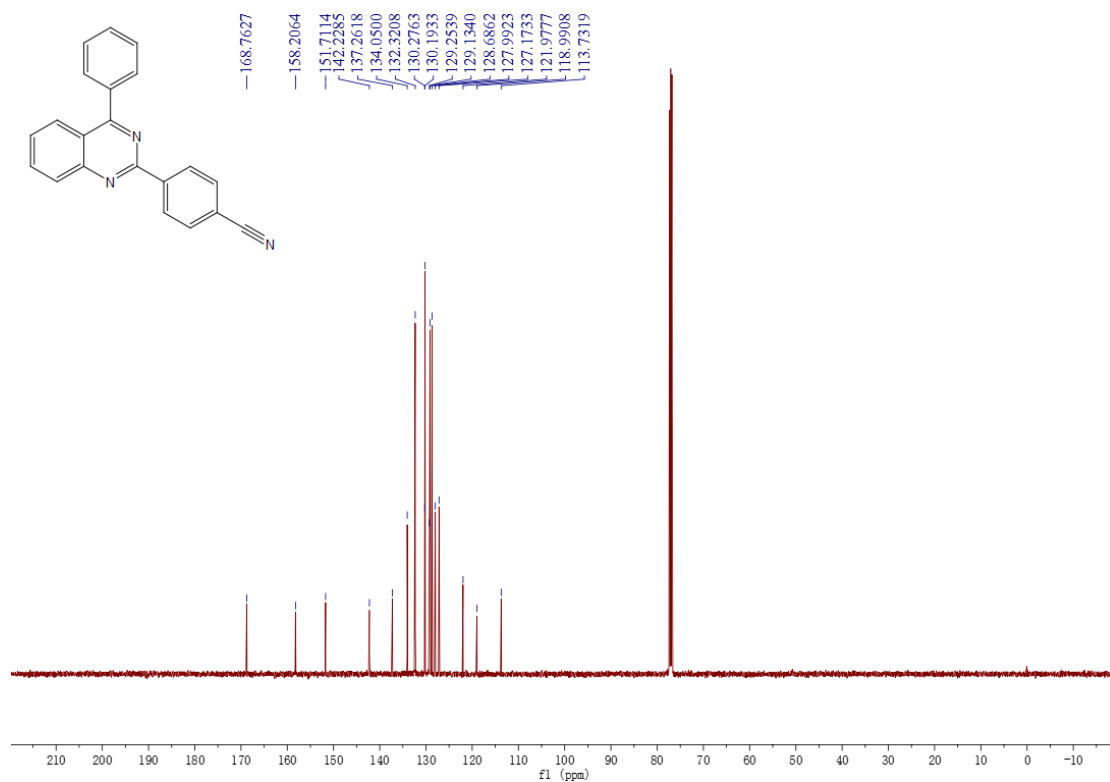

### 3t <sup>1</sup>H NMR

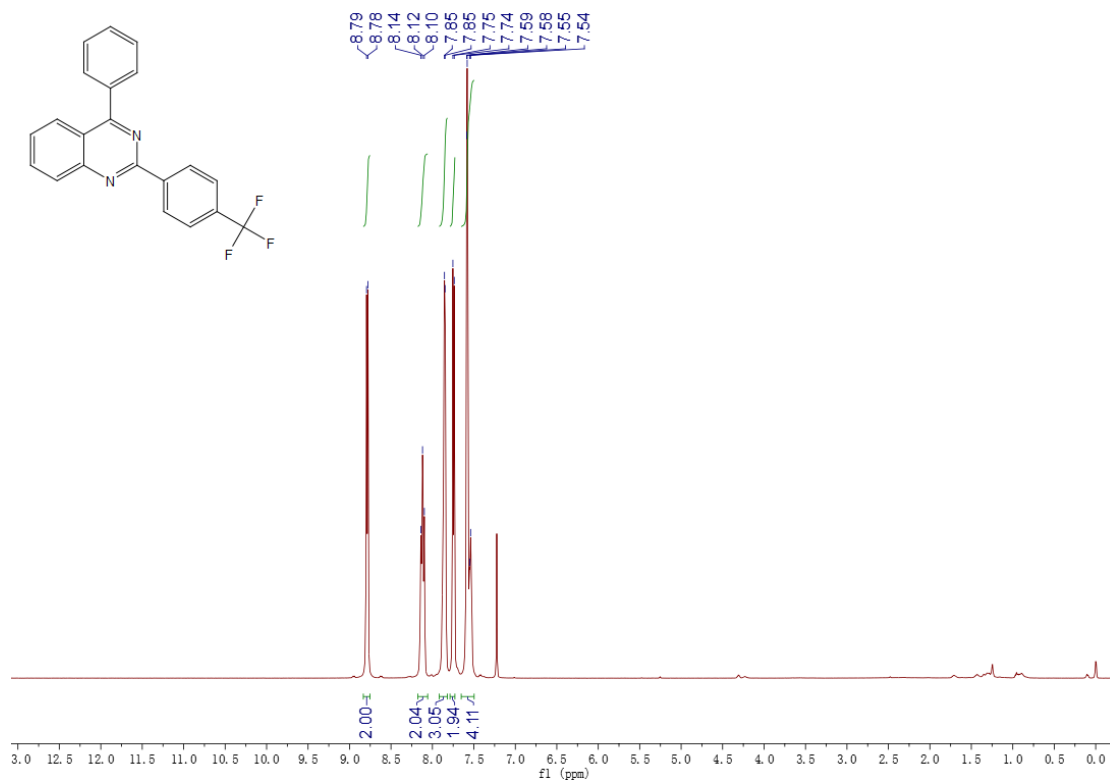

### 3t <sup>13</sup>C NMR

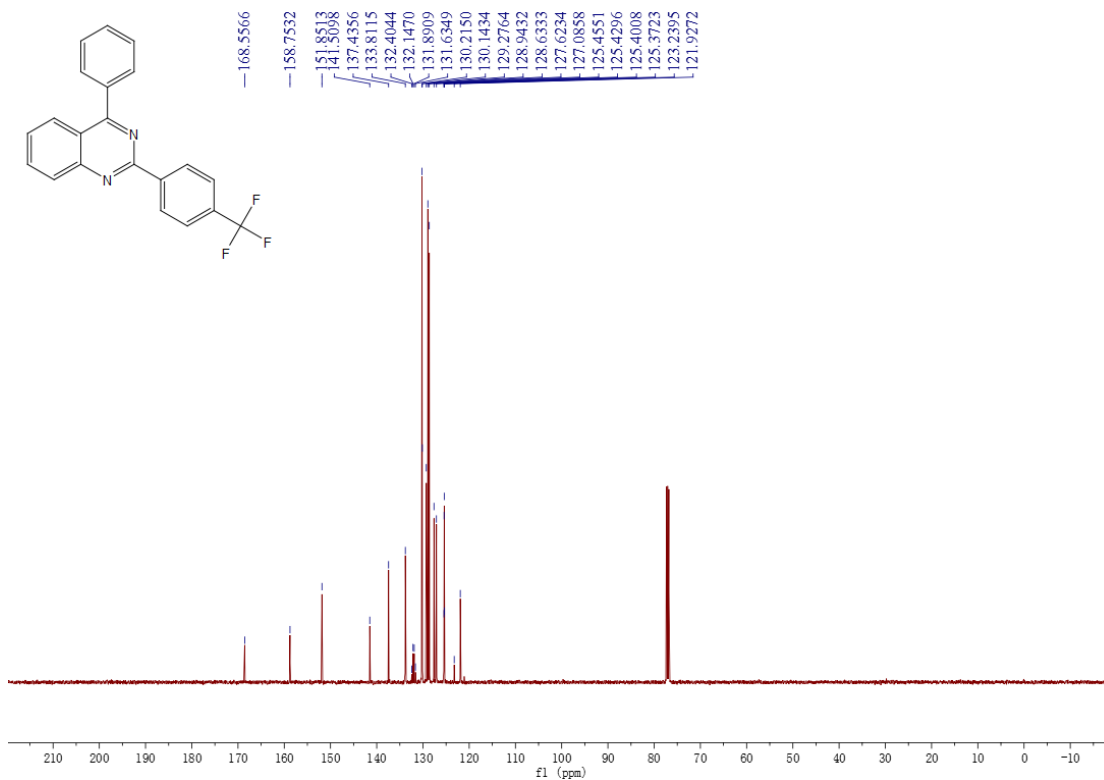



### 3t $^{19}\text{F}$ NMR

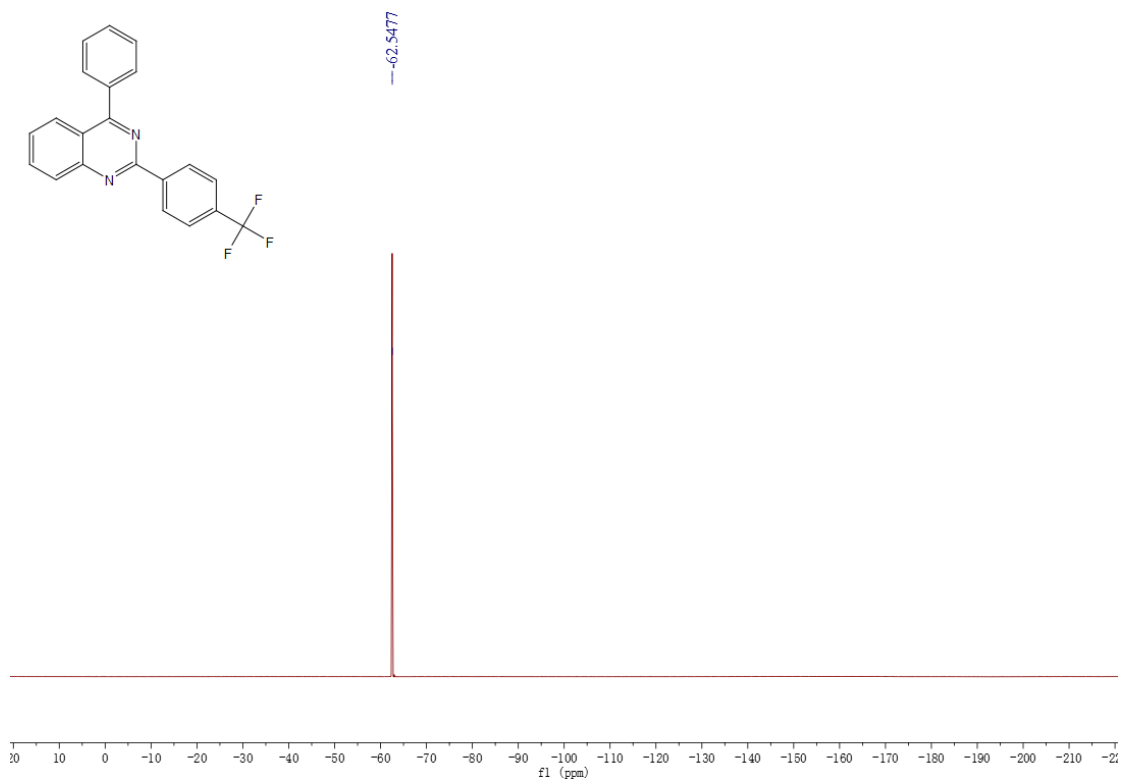

### 3u <sup>1</sup>H NMR

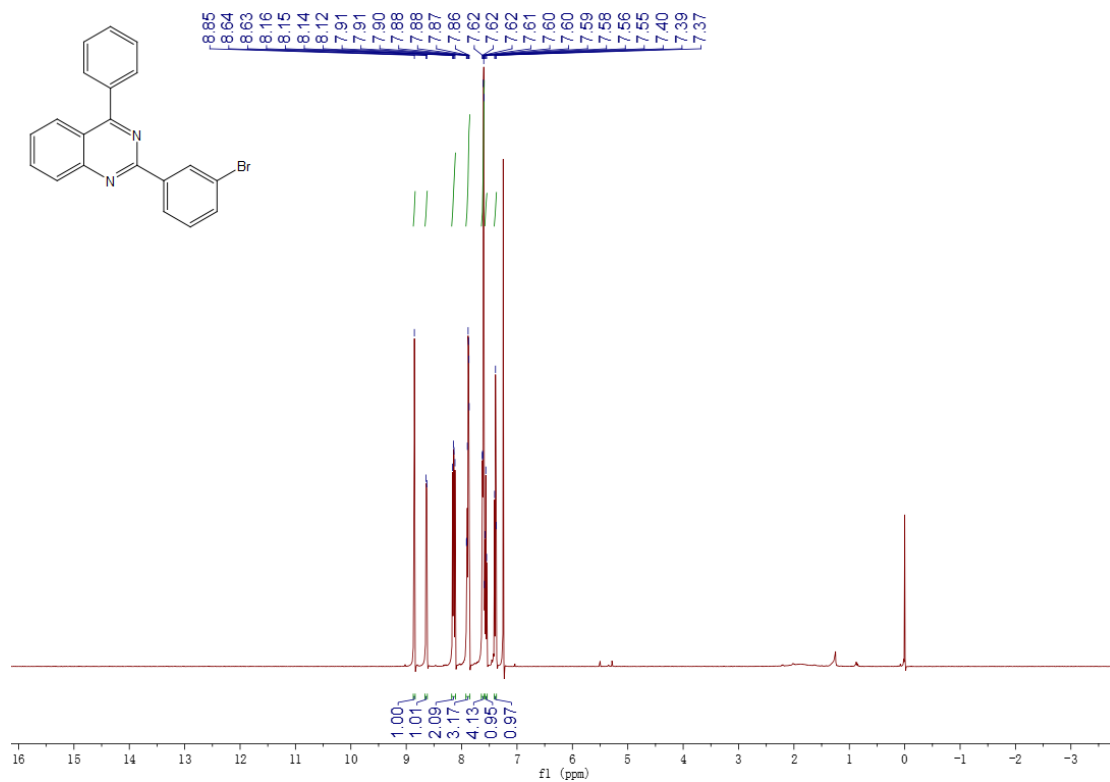

### 3u <sup>13</sup>C NMR

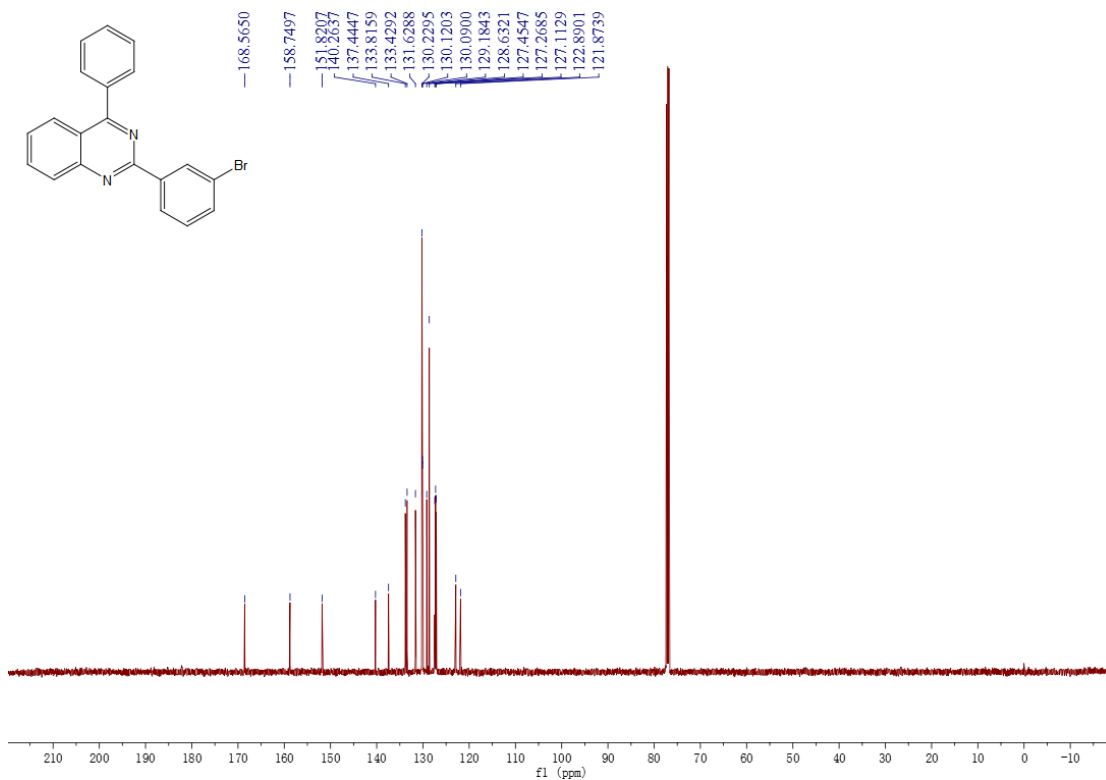

### 3v <sup>1</sup>H NMR

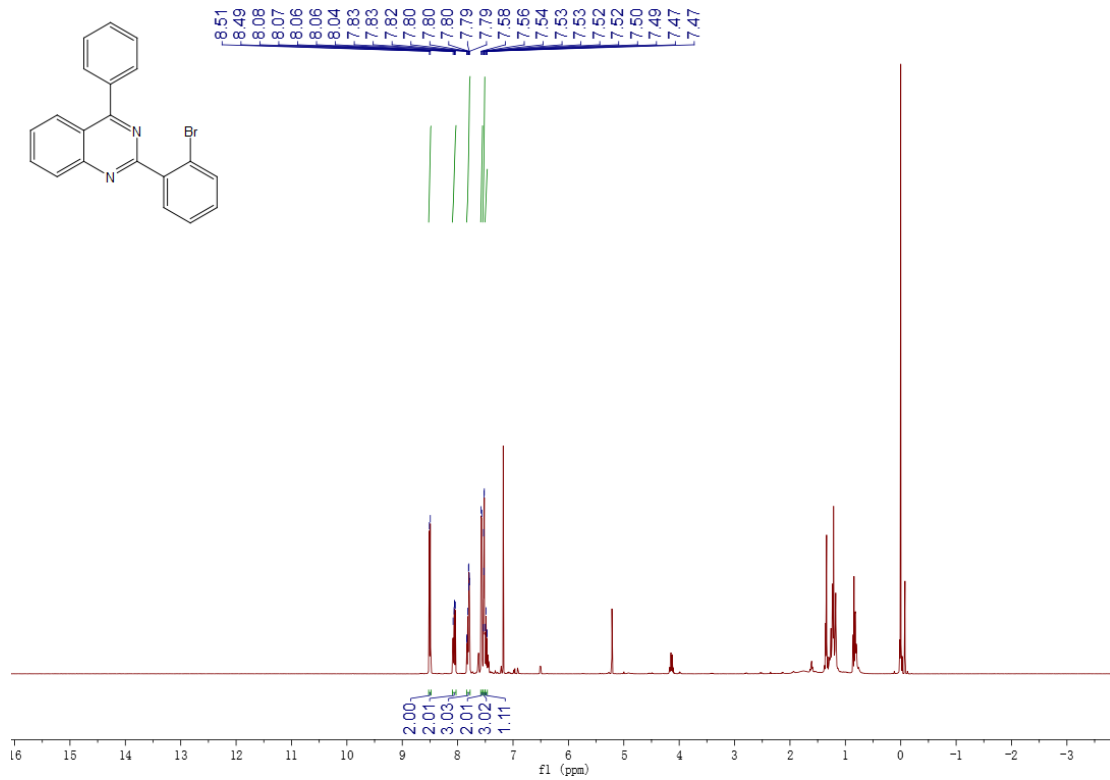

### 3v <sup>13</sup>C NMR

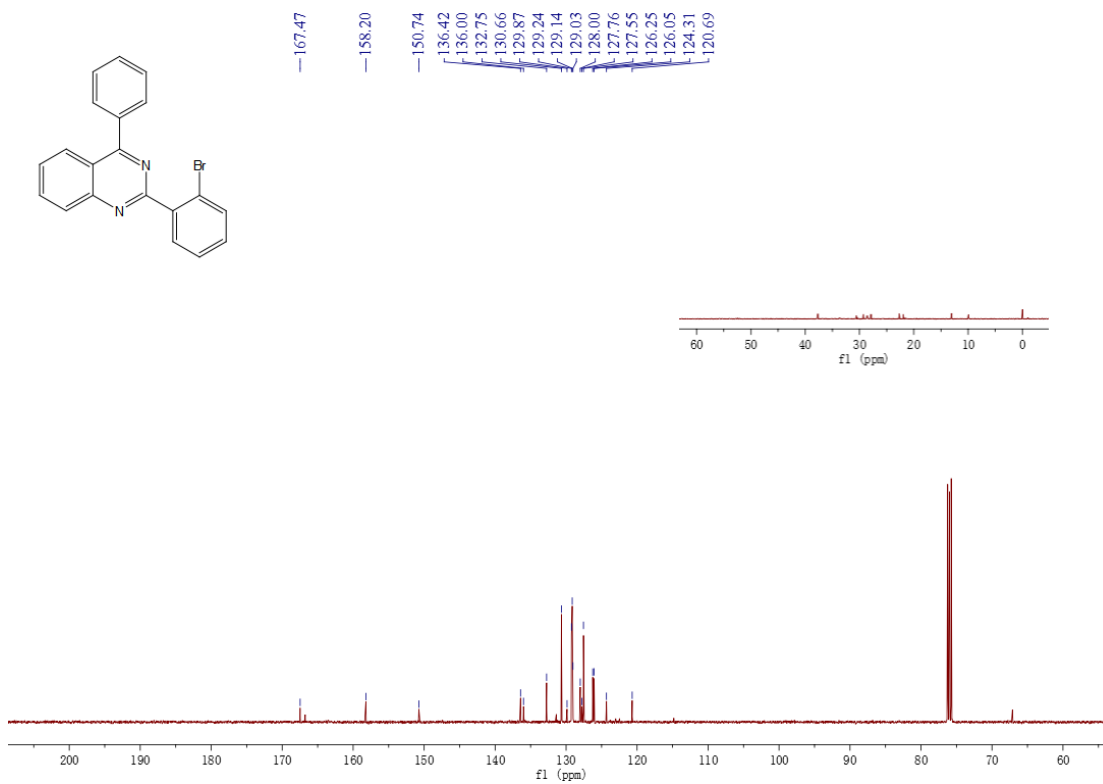

## 5. Control Experiments

### 5.1 No TEMPO reaction

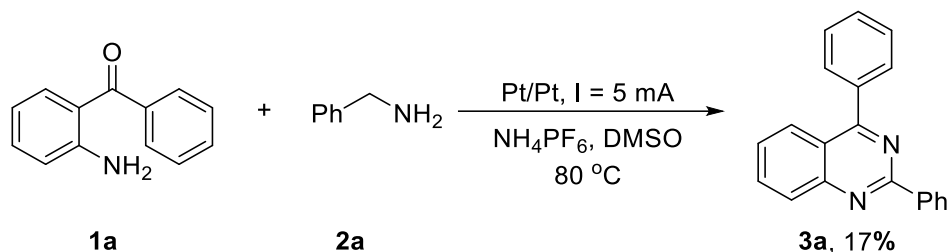

**1a** (2-aminobenzophenone, 0.3 mmol, 59.2 mg), and  $\text{NH}_4\text{PF}_6$  (0.6 mmol, 97.8 mg), were added to a 100 mL reaction vial, followed by the addition of 3 mL DMSO using a plastic pipette. Then add **2a** (benzylamine, 0.6 mmol, 65.5  $\mu\text{L}$ ) with a pipette and use the Pt/Pt as electrodes. The reaction mixture was heated at 80°C while stirring and monitoring the voltage. When the reaction was completed, the reaction solution was extracted three times with water and ethyl acetate, and the combined organic phases were dried over anhydrous sodium sulfate and evaporated in vacuo to obtain the crude product. The residue was purified by flash column chromatography (petroleum ether/ethyl acetate) to give **3a**.

### 5.2 Isotope labeling experiment

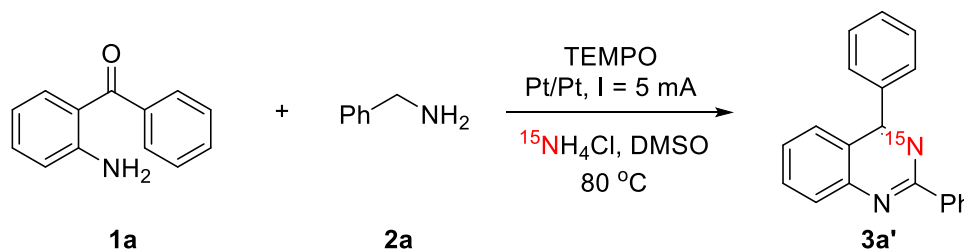

**1a** (2-aminobenzophenone, 0.3 mmol, 59.2 mg), ammonium chloride ( $^{15}\text{NH}_4\text{Cl}$ , 0.6 mmol, 32.4 mg) and TEMPO (2,2,6,6-tetramethylpiperidinoxy, 0.06 mmol, 4.7 mg) were added to a 10 mL reaction vial, followed by addition of 3 mL DMSO using a plastic pipette. Then add **2a** (benzylamine, 0.6 mmol, 65.5  $\mu\text{L}$ ) with a pipette and use the Pt/Pt as electrodes. The reaction mixture was heated at 80°C while stirring and monitoring the voltage. When the reaction was completed, the reaction solution was extracted three times with water and ethyl acetate, and the combined organic phases were dried over anhydrous sodium sulfate and evaporated in vacuo to obtain the crude product. The residue was purified by flash column chromatography (petroleum ether/ethyl acetate) to give the  $^{15}\text{N}$ -labelled quinazoline **3a'** (60%).

### 5.3 Benzylamine replaced by benzylbromide

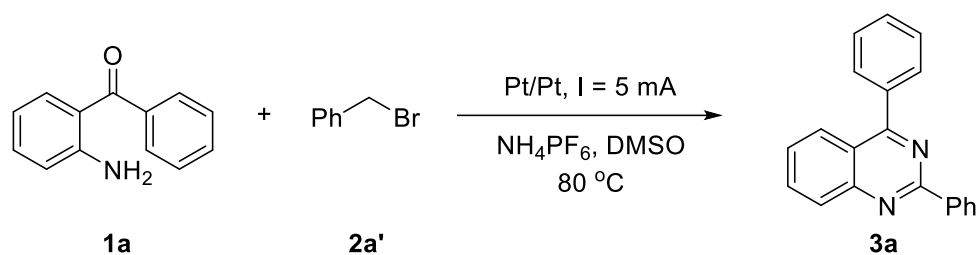

**1a** (2-aminobenzophenone, 0.3 mmol, 59.2 mg), NH<sub>4</sub>PF<sub>6</sub> (0.6 mmol, 97.8 mg) and TEMPO (2,2,6,6-tetramethylpiperidinoxy, 0.06 mmol, 4.7 mg) were added to a 10 mL reaction vial, followed by addition of 3 mL DMSO using a plastic pipette. Then add **2a'** (benzyl bromide, 0.6 mmol, 71.3  $\mu$ L) with a pipette and use the Pt/Pt as electrodes. The reaction mixture was heated at 80 °C while stirring and monitoring the voltage. When the reaction was completed, the reaction solution was extracted three times with water and ethyl acetate, and the combined organic phases were dried over anhydrous sodium sulfate and evaporated in vacuo to obtain the crude product. The residue was purified by flash column chromatography (petroleum ether/ethyl acetate) to give **3a** (43%)

## 6. References

1. Jintang Zhang, Dapeng Zhu, Chenmin Yu, Changfeng Wan and Zhiyong Wang, *Org. Lett.*, 2010, **12**, 2841–2843.
2. Rupam Sarma and Dipak Prajapati, *Green Chem.*, 2011, **13**, 718-722.
3. K. Karnakar, A. V. Kumar, S. N. Murthy, K. Ramesh and Y. V. D. Nageswar, *Tetrahedron Lett.*, 2012, **53**, 4613-461.
4. Fen Wang, He Wang, Qiang Wang, Songjie Yu and Xingwei Li, *Org. Lett.*, 2016, **18**, 1306–1309.
5. Bijay Shrestha, Surendra Thapa, Santosh K. Gurung, Ryan A. S. Pike, and Ramesh Giri, *J. Org. Chem.*, 2016, **81**, 787–802.
6. Yizhe Yan, Miaomiao Shi, Bin Niu, Xiangping Meng, Changrui Zhu, Gengyao Liu, Ting Chena and Yanqi Liu, *RSC Adv.*, 2016, **6**, 36192-36197.
7. Jian-Ping Lin, Feng-Hua, Zhang and Ya-Qiu Long, *Org. Lett.*, 2014, **16**, 2822–2825.
8. Zi-chao Shen, Pan Yang and Yu Tang, *J. Org. Chem.*, 2016, **81**, 309-317
9. Eswararao, S., Venkataramireddy, V., Srinivasareddy, M., & Kumar, P., *Asian Journal of Chemistry*, 2017, **29**, 1434–1440.
10. Xu Wang, Dandan He, Yubing Huang, Qihang Fan, Wanqing Wu and Huanfeng Jiang, *J. Org. Chem.*, 2018, **83**, 5458-5466.
11. Jianghe Zhu, Yinlin Shao, Kun Hu, Linjun Qi, Tianxing Cheng and Jiuxi Chen, *Org. Biomol. Chem.*, 2018, **16**, 8596-8603.
12. Chieh-Kai Chan, Chien-Yu Lai and Cheng-Chung Wang, *Org. Biomol. Chem.*, 2020, **18**, 7201-7212.
